# Supplementary material for: Association of Long-Acting Injectable Antipsychotics and Oral Antipsychotics With Disease Relapse, Health Care Use, and Adverse Events Among People With Schizophrenia
Source: PubMed Central journal article supplement (PMC9335136; doi:10.1001/jamanetworkopen.2022.24163), 2022-07-28
Supplement: jamanetwopen-e2224163-s001.pdf [file jamanetwopen-e2224163-s001.pdf]

## Supplementary Online Content

Wei Y, Yan VKC, Kang W, et al. Association of long-acting injectable antipsychotics and oral antipsychotics with disease relapse, health care use, and adverse events among people with schizophrenia. *JAMA Netw Open*. 2022;5(7):e2224163.

doi:10.1001/jamanetworkopen.2022.24163

**eMethods.** Methods for the Subgroup Analyses, Sensitivity Analyses, Negative Control Analysis and E-Value Calculation

**eTable 1.** Half-lives of the Antipsychotics Used in Hong Kong Public Hospitals

**eTable 2.** Definition of the Outcome Events

**eTable 3.** Patient Characteristics by Sex

**eTable 4.** Patient Characteristics by Age, for the Primary Outcomes

**eTable 5.** Patient Characteristics by Age, for the Secondary Outcomes

**eTable 6.** Patient Characteristics by Initiation Time of LAIAs

**eTable 7.** Patient Characteristics by Schizophrenia Cohort

**eTable 8.** Patient Characteristics by Length of Follow-up

**eTable 9.** Patient Characteristics by Substance Use

**eTable 10.** Sensitivity Analysis by Restricting the Age Range of Early/Late LAIAs Initiators

**eTable 11.** Results From E-Value Analyses

**eTable 12.** Results of Self-controlled Case Series Analysis for the Use of LAIAs Alone vs OAs Alone and the Risk of Outcome Events, During the First 90 Days of Treatment

**eTable 13.** Results of Self-controlled Case Series Analysis for the Full Treatment Period of OAs Alone, Full Treatment Period of LAIAs Alone, and Full Treatment Period of the Combination Use of OAs plus LAIAs vs Baseline Period or Preexposure Period, and the Risk of Outcome Events

**eTable 14.** Results of Self-controlled Case Series Analysis for the First 90 Days of OAs Alone, the Subsequent Use of OAs Alone, the First 90 Days of LAIAs Alone, the Subsequent Use of LAIAs Alone, the First 90 Days of OAs Plus LAIAs, the Subsequent Use of OAs Plus LAIAs vs Baseline Period or Preexposure Period, and the Risk of Outcome Events

**eTable 15.** The Rate of Outcome Events During Different Risk Windows

**eFigure 1.** Illustration of Self-controlled Case Series Study for Indirect Comparison

**eFigure 2.** Patient Identification

**eFigure 3.** Subgroup Analyses for the Use of LAIAs vs OAs and Risk of Outcomes, During the Subsequent Treatment Period

**eReferences.**

This supplementary material has been provided by the authors to give readers additional information about their work.

**eMethods.** Methods for the Subgroup Analyses, Sensitivity Analyses, Negative Control Analysis and E-Value Calculation

### Subgroup analyses

1. We performed a subgroup analysis by sex to evaluate the associations in males and females.
2. For the subgroup analysis by age, the individual observation period was trimmed based on age. The follow-up for the group of 18-44 years began on January 1, 2004, date of the first diagnosis of schizophrenia or 18<sup>th</sup> birthday (whichever came later) and ended on December 31, 2019, date of death or 45<sup>th</sup> birthday (whichever came first). The follow-up for the group of 45-65 years began on January 1, 2004, date of the first diagnosis of schizophrenia or 45<sup>th</sup> birthday (whichever came later) and ended on December 31, 2019, date of death or 65<sup>th</sup> birthday (whichever came first). The follow-up for the group of over 65 years began on January 1, 2004, date of the first diagnosis of schizophrenia or 65<sup>th</sup> birthday (whichever came later) and ended on December 31, 2019 or date of death (whichever came first).
3. Another subgroup analysis was conducted according to the time since the first diagnosis of schizophrenia to the initiation of LAIAs. The early LAIAs initiators were defined as people who started a LAIA within two years of the first diagnosis of schizophrenia, while the late LAIAs initiators were defined as those starting LAIAs after two years. Since the prescription information before 2002 in CDARS is not well-recorded and the date of the first schizophrenia diagnosis in the prevalent cohort (diagnosed with schizophrenia before January 1, 2004) may not be accurate, only people in the incident cohort (newly

diagnosed with schizophrenia on or after January 1, 2004) were included in this subgroup analysis.

4. According to the time of the first diagnosis of schizophrenia, we divided the cohort into prevalent cohort (date of first schizophrenia diagnosis before January 1, 2004 [not including this date]) and incident cohort (date of first schizophrenia diagnosis on or after January 1, 2004), to assess whether different associations were observed among the incident patients.
5. To avoid bias from people who were followed for a very short period, we stratified the cohort into the subgroup with long follow-up ( $\geq 10$  years) and short follow-up ( $< 10$  years). The length of follow-up was defined by the start date and end date of the individual observation period.
6. We further performed a subgroup analysis by substance use. People with substance use were defined as those diagnosed with substance use (ICD-9-CM 292, 304, 305.2-305.9) before the end of the observation period (any time before or during the observation period).

#### Sensitivity analyses

1. Since clozapine is mainly used to manage treatment-resistant psychosis, the disease profiles of people prescribed clozapine could be different from those treated with other antipsychotics. However, there is no long-acting formulation for clozapine, and most patients stay on clozapine long-term. Therefore, we repeated the analysis after excluding individuals with at least one prescription of clozapine before the end of the observation period.

2. Since the diagnosis of bipolar disorder (ICD-9-CM 296.1, 296.4, 296.5, 296.6, 296.7, 296.8) and the diagnosis of schizophrenia (ICD-9-CM 295) are mutually exclusive in clinical practice, people who were diagnosed with bipolar disorder during the observation period should not be included in the analysis after the diagnosis. Therefore, we repeated the analysis after excluding individuals diagnosed with bipolar disorders during the observation period.
3. People who died during the observation period were excluded in the sensitivity analysis to further reduce the potential bias from the event-dependent observation period.
4. We repeated the analyses for the first outcome event during the observation period to control for any correlations between these events and to test for any violation of the SCCS assumption that the outcome events should be independent.
5. The secondary diagnoses of hospitalization were usually documented for the history of the disease, so we included only those hospitalizations with an eligible principal diagnosis in the sensitivity analysis.
6. Non-adherence is usually an indication of switching from OAs to LAIAs, and an adverse event may lead to a switch of antipsychotics, which could introduce event-dependent exposure and violate the SCCS assumption that the occurrence of an event should not influence the subsequent exposure. Hence, we repeated the analysis after excluding the 30-day antipsychotic treatment before switching formulations.
7. Although a washout period of five half-lives of each antipsychotic had been added to account for any residual treatment effect in the main analysis, we added an extra washout period of 30 days to further account for the residual effect.

8. It was reported that patients usually discontinued LAIAs due to various reasons.<sup>1</sup> To detect any potential cohort effect among these patients, we repeated the analysis among patients who switched from LAIAs (at least 30 days) to OAs (at least 30 days) at least once during the observation period.
9. Compared with patients with only a few antipsychotic prescriptions, people who visited hospitals regularly to obtain antipsychotic prescriptions over a long period were more likely to have better adherence and the discrepancy between their prescription records and the actual medication administration was more minor. Therefore, we repeated the analysis among patients who had at least 10 prescriptions of antipsychotics per year for over 5 years.
10. In consideration that the first diagnosis of schizophrenia might be delayed in registry data, we further restricted patients in the subgroup analysis by initiation time of LAIAs (Subgroup analysis 3) to those newly diagnosed with schizophrenia at age 18-35 years.

#### Negative control analysis

- Additionally, we performed a negative control analysis by using upper respiratory tract infection (ICD-9-CM 010-012, 031.0, 032.1-3, 033-034, 039.1, 040.1, 460-466, 472-476, 480-488, 490, 491) as the outcome events to validate our results, since there is no evidence of an association between the formulation of antipsychotics and upper respiratory tract infections.

#### E-value calculation

- E-value was calculated to assess the potential effects of any unmeasured confounding, which was defined as the minimum strength of association that an unmeasured

confounder would need to have with both treatment and outcome, conditional on the measured covariates, to explain away an observed association.<sup>2</sup>

**eTable 1.** Half-lives of the Antipsychotics Used in Hong Kong Public Hospitals

| <b>Drug name</b> | <b>Elimination half-life (hours)</b> |
|------------------|--------------------------------------|
| Amisulpride      | 12                                   |
| Aripiprazole     | 94                                   |
| Asenapine        | 24                                   |
| Chlorpromazine   | 30                                   |
| Clopentixol      | 28                                   |
| Clozapine        | 14                                   |
| Flupenthixol     | 35                                   |
| Fluphenazine     | 58                                   |
| Haloperidol      | 24                                   |
| Lurasidone       | 40                                   |
| Olanzapine       | 33                                   |
| Paliperidone     | 23                                   |
| Pericyazine      | 12                                   |
| Perphenazine     | 20                                   |
| Pimozide         | 55                                   |
| Quetiapine       | 12                                   |
| Risperidone      | 20                                   |
| Sertindole       | 72                                   |
| Sulpiride        | 8                                    |
| Thioridazine     | 30                                   |
| Thiothixene      | 34                                   |
| Trifluoperazine  | 20                                   |
| Ziprasidone      | 10                                   |
| Zuclopenthixol   | 28                                   |

**eTable 2.** Definition of the Outcome Events

| <b>Outcomes</b>                                | <b>Data source</b>                     | <b>Definition</b>                                                                                                                                                                                                                                                                        |
|------------------------------------------------|----------------------------------------|------------------------------------------------------------------------------------------------------------------------------------------------------------------------------------------------------------------------------------------------------------------------------------------|
| All-cause emergency department visits          | All emergency department visit records | Defined as an emergency department attendance for any cause                                                                                                                                                                                                                              |
| All-cause hospitalizations                     | All inpatient admission records        | Defined as a hospitalization for any cause                                                                                                                                                                                                                                               |
| Hospitalizations for any psychiatric disorders | All inpatient admission records        | Defined as a hospitalization with ICD-9-CM diagnosis code: 290-319                                                                                                                                                                                                                       |
| Hospitalizations for schizophrenia             | All inpatient admission records        | Defined as a hospitalization with ICD-9-CM diagnosis code: 295                                                                                                                                                                                                                           |
| Incident suicide attempt                       | All diagnosis                          | Defined as the first suicide attempt during the observation period of patients who had never had suicide attempts before the observation period. The ICD-9-CM diagnosis code for a suicide attempt is E950-E959.                                                                         |
| Hospitalizations for any somatic disorders     | All inpatient admission records        | Defined as a hospitalization with ICD-9-CM diagnosis code: 000-289, 320-999                                                                                                                                                                                                              |
| Hospitalizations for cardiovascular diseases   | All inpatient admission records        | Defined as a hospitalization with ICD-9-CM diagnosis code: 390-459                                                                                                                                                                                                                       |
| Extrapyramidal symptoms                        | All diagnosis                          | Defined as a new prescription of the medications for extrapyramidal symptoms (>180 days gap between the previous prescription for extrapyramidal symptoms). Medications used for extrapyramidal symptoms included trihexyphenidyl, benztropine, amantadine and biperiden. <sup>3,4</sup> |

Abbreviations: ICD-9-CM, International Classification of Diseases, Ninth Revision, Clinical Modification.



**eTable 3.** Patient Characteristics by Sex

| Patient characteristics                                           | Individuals prescribed both OAs and LAIAs, with at least one of the following outcome events during the observation period |                  |                            |                  |                                            |                  |                                    |                  |                          |                  |                                        |                  |                                              |                  |                         |                  |
|-------------------------------------------------------------------|----------------------------------------------------------------------------------------------------------------------------|------------------|----------------------------|------------------|--------------------------------------------|------------------|------------------------------------|------------------|--------------------------|------------------|----------------------------------------|------------------|----------------------------------------------|------------------|-------------------------|------------------|
|                                                                   | Primary outcomes                                                                                                           |                  |                            |                  |                                            |                  |                                    |                  |                          |                  | Secondary outcomes                     |                  |                                              |                  |                         |                  |
|                                                                   | All-cause ED visits                                                                                                        |                  | All-cause hospitalizations |                  | Hospitalizations for psychiatric disorders |                  | Hospitalizations for schizophrenia |                  | Incident suicide attempt |                  | Hospitalizations for somatic disorders |                  | Hospitalizations for cardiovascular diseases |                  | Extrapyramidal symptoms |                  |
|                                                                   | Female                                                                                                                     | Male             | Female                     | Male             | Female                                     | Male             | Female                             | Male             | Female                   | Male             | Female                                 | Male             | Female                                       | Male             | Female                  | Male             |
| <b>No. of patients</b>                                            | 10551                                                                                                                      | 11462            | 10110                      | 10863            | 9317                                       | 9966             | 8859                               | 9526             | 613                      | 840              | 7420                                   | 7976             | 1653                                         | 2057             | 10646                   | 11536            |
| <b>Age, mean (SD), y</b>                                          |                                                                                                                            |                  |                            |                  |                                            |                  |                                    |                  |                          |                  |                                        |                  |                                              |                  |                         |                  |
| <b>At first schizophrenia diagnosis</b>                           | 40.10<br>(12.93)                                                                                                           | 37.81<br>(12.60) | 40.10<br>(12.99)           | 37.87<br>(12.72) | 39.71<br>(12.96)                           | 37.40<br>(12.69) | 39.74<br>(12.96)                   | 37.48<br>(12.70) | 34.34<br>(11.57)         | 32.57<br>(10.27) | 41.55<br>(13.43)                       | 39.72<br>(13.04) | 48.65<br>(13.53)                             | 46.38<br>(12.34) | 39.90<br>(12.53)        | 37.54<br>(12.30) |
| <b>At cohort entry</b>                                            | 42.75<br>(12.95)                                                                                                           | 40.77<br>(12.82) | 42.75<br>(13.01)           | 40.83<br>(12.94) | 42.34<br>(13.00)                           | 40.35<br>(12.92) | 42.40<br>(13.01)                   | 40.47<br>(12.93) | 36.94<br>(11.65)         | 35.42<br>(10.64) | 44.51<br>(13.36)                       | 42.93<br>(13.12) | 52.06<br>(13.16)                             | 50.09<br>(11.88) | 42.51<br>(12.52)        | 40.47<br>(12.51) |
| <b>At time of event</b>                                           | 48.53<br>(13.83)                                                                                                           | 47.66<br>(13.57) | 51.44<br>(15.14)           | 50.50<br>(14.88) | 48.35<br>(14.66)                           | 47.20<br>(14.38) | 48.79<br>(14.59)                   | 48.12<br>(14.36) | 42.21<br>(12.45)         | 40.51<br>(11.83) | 56.11<br>(14.81)                       | 55.95<br>(14.04) | 63.81<br>(12.86)                             | 61.31<br>(11.89) | 44.19<br>(12.81)        | 41.79<br>(12.77) |
| <b>Death</b>                                                      |                                                                                                                            |                  |                            |                  |                                            |                  |                                    |                  |                          |                  |                                        |                  |                                              |                  |                         |                  |
| <b>No. (%) of patients who died during the observation period</b> | 1356<br>(12.85)                                                                                                            | 2156<br>(18.81)  | 1314<br>(13.00)            | 2065<br>(19.01)  | 1181<br>(12.68)                            | 1822<br>(18.28)  | 1119<br>(12.63)                    | 1748<br>(18.35)  | 77<br>(12.56)            | 159<br>(18.93)   | 1170<br>(15.77)                        | 1844<br>(23.12)  | 585<br>(35.39)                               | 912<br>(44.34)   | 1263<br>(11.86)         | 2051<br>(17.78)  |
| <b>Age at death, mean (SD), y</b>                                 | 61.36<br>(15.47)                                                                                                           | 58.87<br>(14.41) | 61.54<br>(15.47)           | 59.20<br>(14.39) | 61.30<br>(15.72)                           | 59.07<br>(14.69) | 61.56<br>(15.62)                   | 59.44<br>(14.49) | 48.44<br>(14.54)         | 48.78<br>(12.92) | 63.52<br>(14.60)                       | 61.06<br>(13.32) | 67.83<br>(13.38)                             | 64.47<br>(11.52) | 60.47<br>(15.24)        | 57.98<br>(14.31) |

Abbreviations: OAs, oral antipsychotics; LAIAs, long-acting injectable antipsychotics; ED, emergency department; SD, standard deviation

**eTable 4.** Patient Characteristics by Age, for the Primary Outcomes

| Patient characteristics                                           | Individuals prescribed both OAs and LAIAs, with at least one of the following outcome events during the observation period |                  |                  |                            |                  |                  |                                            |                  |                  |                                    |                  |                  |                          |                  |                  |
|-------------------------------------------------------------------|----------------------------------------------------------------------------------------------------------------------------|------------------|------------------|----------------------------|------------------|------------------|--------------------------------------------|------------------|------------------|------------------------------------|------------------|------------------|--------------------------|------------------|------------------|
|                                                                   | Primary outcomes                                                                                                           |                  |                  |                            |                  |                  |                                            |                  |                  |                                    |                  |                  |                          |                  |                  |
|                                                                   | All-cause ED visits                                                                                                        |                  |                  | All-cause hospitalizations |                  |                  | Hospitalizations for psychiatric disorders |                  |                  | Hospitalizations for schizophrenia |                  |                  | Incident suicide attempt |                  |                  |
|                                                                   | 18-44 years                                                                                                                | 45-65 years      | > 65 years       | 18-44 years                | 45-65 years      | > 65 years       | 18-44 years                                | 45-65 years      | > 65 years       | 18-44 years                        | 45-65 years      | > 65 years       | 18-44 years              | 45-65 years      | > 65 years       |
| <b>No. of patients</b>                                            | 13330                                                                                                                      | 15419            | 4855             | 12660                      | 14636            | 4668             | 11912                                      | 13264            | 4140             | 11304                              | 12703            | 4004             | 1132                     | 885              | 146              |
| <b>Sex, No. (%)</b>                                               |                                                                                                                            |                  |                  |                            |                  |                  |                                            |                  |                  |                                    |                  |                  |                          |                  |                  |
| <b>Female</b>                                                     | 6110<br>(45.84)                                                                                                            | 7592<br>(49.24)  | 2516<br>(51.82)  | 5845<br>(46.17)            | 7244<br>(49.49)  | 2415<br>(51.74)  | 5508<br>(46.24)                            | 6597<br>(49.74)  | 2142<br>(51.74)  | 5215<br>(46.13)                    | 6291<br>(49.52)  | 2062<br>(51.50)  | 465<br>(41.08)           | 382<br>(43.16)   | 71<br>(48.63)    |
| <b>Male</b>                                                       | 7220<br>(54.16)                                                                                                            | 7827<br>(50.76)  | 2339<br>(48.18)  | 6815<br>(53.83)            | 7392<br>(50.51)  | 2253<br>(48.26)  | 6404<br>(53.76)                            | 6667<br>(50.26)  | 1998<br>(48.26)  | 6089<br>(53.87)                    | 6412<br>(50.48)  | 1942<br>(48.50)  | 667<br>(58.92)           | 503<br>(56.84)   | 75<br>(51.37)    |
| <b>Age, mean (SD), y</b>                                          |                                                                                                                            |                  |                  |                            |                  |                  |                                            |                  |                  |                                    |                  |                  |                          |                  |                  |
| <b>At first schizophrenia diagnosis</b>                           | 30.79<br>(7.31)                                                                                                            | 41.71<br>(9.39)  | 55.51<br>(8.69)  | 30.72<br>(7.32)            | 41.75<br>(9.42)  | 55.59<br>(8.74)  | 30.55<br>(7.32)                            | 41.53<br>(9.44)  | 55.53<br>(8.72)  | 30.55<br>(7.31)                    | 41.53<br>(9.44)  | 55.50<br>(8.69)  | 28.98<br>(7.16)          | 38.43<br>(8.91)  | 52.75<br>(7.09)  |
| <b>At cohort entry</b>                                            | 33.40<br>(7.45)                                                                                                            | 48.59<br>(5.11)  | 66.30<br>(3.37)  | 33.33<br>(7.45)            | 48.63<br>(5.14)  | 66.33<br>(3.41)  | 33.13<br>(7.46)                            | 48.53<br>(5.10)  | 66.31<br>(3.34)  | 33.16<br>(7.46)                    | 48.55<br>(5.11)  | 66.29<br>(3.30)  | 31.58<br>(7.31)          | 47.15<br>(4.08)  | 65.42<br>(1.67)  |
| <b>At time of event</b>                                           | 48.06<br>(13.70)                                                                                                           | 48.06<br>(13.70) | 48.06<br>(13.70) | 50.94<br>(15.01)           | 50.94<br>(15.01) | 50.94<br>(15.01) | 47.73<br>(14.52)                           | 47.73<br>(14.52) | 47.73<br>(14.52) | 48.43<br>(14.47)                   | 48.43<br>(14.47) | 48.43<br>(14.47) | 41.23<br>(12.12)         | 41.23<br>(12.12) | 41.23<br>(12.12) |
| <b>Death</b>                                                      |                                                                                                                            |                  |                  |                            |                  |                  |                                            |                  |                  |                                    |                  |                  |                          |                  |                  |
| <b>No. (%) of patients who died during the observation period</b> | 1111<br>(8.33)                                                                                                             | 2301<br>(14.92)  | 1313<br>(27.04)  | 1054<br>(8.33)             | 2218<br>(15.15)  | 1288<br>(27.59)  | 985<br>(8.27)                              | 1959<br>(14.77)  | 1148<br>(27.73)  | 920<br>(8.14)                      | 1887<br>(14.85)  | 1115<br>(27.85)  | 153<br>(13.52)           | 134<br>(15.14)   | 22<br>(15.07)    |
| <b>Age at death, mean (SD), y</b>                                 | 43.46<br>(9.43)                                                                                                            | 60.35<br>(7.89)  | 74.64<br>(6.99)  | 43.61<br>(9.44)            | 60.44<br>(7.92)  | 74.72<br>(7.01)  | 43.56<br>(9.55)                            | 60.62<br>(8.03)  | 74.82<br>(7.04)  | 43.88<br>(9.48)                    | 60.71<br>(8.04)  | 74.81<br>(6.97)  | 41.59<br>(9.47)          | 56.71<br>(7.07)  | 72.28<br>(6.61)  |

Abbreviations: OAs, oral antipsychotics; LAIAs, long-acting injectable antipsychotics; ED, emergency department; SD, standard deviation

**eTable 5.** Patient Characteristics by Age, for the Secondary Outcomes

| Patient characteristics                                           | Individuals prescribed both OAs and LAIAs, with at least one of the following outcome events during the observation period |               |               |                                              |               |               |                         |               |               |
|-------------------------------------------------------------------|----------------------------------------------------------------------------------------------------------------------------|---------------|---------------|----------------------------------------------|---------------|---------------|-------------------------|---------------|---------------|
|                                                                   | Secondary outcomes                                                                                                         |               |               |                                              |               |               |                         |               |               |
|                                                                   | Hospitalizations for somatic disorders                                                                                     |               |               | Hospitalizations for cardiovascular diseases |               |               | Extrapyramidal symptoms |               |               |
|                                                                   | 18-44 years                                                                                                                | 45-65 years   | > 65 years    | 18-44 years                                  | 45-65 years   | > 65 years    | 18-44 years             | 45-65 years   | > 65 years    |
| <b>No. of patients</b>                                            | 8312                                                                                                                       | 11296         | 4252          | 1157                                         | 2912          | 1718          | 13579                   | 15664         | 4649          |
| <b>Sex, No. (%)</b>                                               |                                                                                                                            |               |               |                                              |               |               |                         |               |               |
| <b>Female</b>                                                     | 3851 (46.33)                                                                                                               | 5508 (48.76)  | 2191 (51.53)  | 480 (41.49)                                  | 1238 (42.51)  | 829 (48.25)   | 6213 (45.75)            | 7756 (49.51)  | 2411 (51.86)  |
| <b>Male</b>                                                       | 4461 (53.67)                                                                                                               | 5788 (51.24)  | 2061 (48.47)  | 677 (58.51)                                  | 1674 (57.49)  | 889 (51.75)   | 7366 (54.25)            | 7908 (50.49)  | 2238 (48.14)  |
| <b>Age, mean (SD), y</b>                                          |                                                                                                                            |               |               |                                              |               |               |                         |               |               |
| <b>At first schizophrenia diagnosis</b>                           | 30.95 (7.28)                                                                                                               | 42.40 (9.54)  | 55.89 (8.79)  | 33.27 (6.77)                                 | 45.54 (9.09)  | 57.38 (8.97)  | 30.90 (7.32)            | 41.68 (9.32)  | 54.96 (8.30)  |
| <b>At cohort entry</b>                                            | 33.86 (7.40)                                                                                                               | 49.10 (5.37)  | 66.42 (3.52)  | 36.91 (6.62)                                 | 50.99 (5.93)  | 66.88 (3.94)  | 33.50 (7.43)            | 48.50 (5.02)  | 66.07 (3.00)  |
| <b>At time of event</b>                                           | 56.02 (14.42)                                                                                                              | 56.02 (14.42) | 56.02 (14.42) | 62.39 (12.38)                                | 62.39 (12.38) | 62.39 (12.38) | 42.97 (12.84)           | 42.97 (12.84) | 42.97 (12.84) |
| <b>Death</b>                                                      |                                                                                                                            |               |               |                                              |               |               |                         |               |               |
| <b>No. (%) of patients who died during the observation period</b> | 806 (9.70)                                                                                                                 | 2055 (18.19)  | 1266 (29.77)  | 289 (24.98)                                  | 1033 (35.47)  | 771 (44.88)   | 1111 (8.18)             | 2203 (14.06)  | 1152 (24.78)  |
| <b>Age at death, mean (SD), y</b>                                 | 45.40 (8.82)                                                                                                               | 60.81 (7.89)  | 74.79 (7.03)  | 48.98 (7.81)                                 | 62.24 (7.63)  | 75.38 (7.06)  | 43.39 (9.39)            | 59.99 (7.92)  | 74.30 (6.84)  |

Abbreviations: OAs, oral antipsychotics; LAIAs, long-acting injectable antipsychotics; ED, emergency department; SD, standard deviation

**eTable 6.** Patient Characteristics by Initiation Time of LAIAs

| Patient characteristics                                           | Individuals prescribed both OAs and LAIAs, with at least one of the following outcome events during the observation period |                  |                            |                  |                                            |                  |                                    |                  |                          |                  |                                        |                  |                                              |                  |                         |                  |
|-------------------------------------------------------------------|----------------------------------------------------------------------------------------------------------------------------|------------------|----------------------------|------------------|--------------------------------------------|------------------|------------------------------------|------------------|--------------------------|------------------|----------------------------------------|------------------|----------------------------------------------|------------------|-------------------------|------------------|
|                                                                   | Primary outcomes                                                                                                           |                  |                            |                  |                                            |                  |                                    |                  |                          |                  | Secondary outcomes                     |                  |                                              |                  |                         |                  |
|                                                                   | All-cause ED visits                                                                                                        |                  | All-cause hospitalizations |                  | Hospitalizations for psychiatric disorders |                  | Hospitalizations for schizophrenia |                  | Incident suicide attempt |                  | Hospitalizations for somatic disorders |                  | Hospitalizations for cardiovascular diseases |                  | Extrapyramidal symptoms |                  |
|                                                                   | Early initiation                                                                                                           | Late initiation  | Early initiation           | Late initiation  | Early initiation                           | Late initiation  | Early initiation                   | Late initiation  | Early initiation         | Late initiation  | Early initiation                       | Late initiation  | Early initiation                             | Late initiation  | Early initiation        | Late initiation  |
| <b>No. of patients</b>                                            | 2617                                                                                                                       | 3478             | 2615                       | 3407             | 2501                                       | 3316             | 2333                               | 3135             | 153                      | 308              | 1509                                   | 2109             | 253                                          | 345              | 2663                    | 3348             |
| <b>Sex, No. (%)</b>                                               |                                                                                                                            |                  |                            |                  |                                            |                  |                                    |                  |                          |                  |                                        |                  |                                              |                  |                         |                  |
| <b>Female</b>                                                     | 1349<br>(51.55)                                                                                                            | 1824<br>(52.44)  | 1369<br>(52.35)            | 1796<br>(52.71)  | 1312<br>(52.46)                            | 1756<br>(52.96)  | 1224<br>(52.46)                    | 1664<br>(53.08)  | 68<br>(44.44)            | 137<br>(44.48)   | 787<br>(52.15)                         | 1103<br>(52.30)  | 116<br>(45.85)                               | 174<br>(50.43)   | 1390<br>(52.20)         | 1757<br>(52.48)  |
| <b>Male</b>                                                       | 1268<br>(48.45)                                                                                                            | 1654<br>(47.56)  | 1246<br>(47.65)            | 1611<br>(47.29)  | 1189<br>(47.54)                            | 1560<br>(47.04)  | 1109<br>(47.54)                    | 1471<br>(46.92)  | 85<br>(55.56)            | 171<br>(55.52)   | 722<br>(47.85)                         | 1006<br>(47.70)  | 137<br>(54.15)                               | 171<br>(49.57)   | 1273<br>(47.80)         | 1591<br>(47.52)  |
| <b>Age, mean (SD), y</b>                                          |                                                                                                                            |                  |                            |                  |                                            |                  |                                    |                  |                          |                  |                                        |                  |                                              |                  |                         |                  |
| <b>At first schizophrenia diagnosis</b>                           | 39.50<br>(13.64)                                                                                                           | 35.62<br>(12.72) | 39.68<br>(13.59)           | 35.68<br>(12.73) | 39.58<br>(13.58)                           | 35.56<br>(12.70) | 39.47<br>(13.57)                   | 35.54<br>(12.73) | 34.66<br>(12.57)         | 32.41<br>(10.53) | 41.53<br>(14.43)                       | 37.38<br>(13.59) | 50.83<br>(14.22)                             | 47.12<br>(14.62) | 39.17<br>(13.07)        | 35.47<br>(12.51) |
| <b>At cohort entry</b>                                            | 39.50<br>(13.64)                                                                                                           | 35.62<br>(12.72) | 39.68<br>(13.59)           | 35.68<br>(12.73) | 39.58<br>(13.58)                           | 35.56<br>(12.70) | 39.47<br>(13.57)                   | 35.54<br>(12.73) | 34.66<br>(12.57)         | 32.41<br>(10.53) | 41.53<br>(14.43)                       | 37.38<br>(13.59) | 50.83<br>(14.22)                             | 47.12<br>(14.62) | 39.17<br>(13.07)        | 35.47<br>(12.51) |
| <b>At time of event</b>                                           | 42.85<br>(14.78)                                                                                                           | 41.33<br>(13.69) | 45.19<br>(15.79)           | 42.98<br>(15.28) | 42.05<br>(14.80)                           | 40.50<br>(14.14) | 42.36<br>(14.85)                   | 41.13<br>(14.43) | 37.62<br>(12.78)         | 37.05<br>(11.16) | 51.43<br>(15.86)                       | 48.80<br>(16.27) | 60.36<br>(13.65)                             | 58.55<br>(14.88) | 39.66<br>(13.11)        | 37.46<br>(12.67) |
| <b>Death</b>                                                      |                                                                                                                            |                  |                            |                  |                                            |                  |                                    |                  |                          |                  |                                        |                  |                                              |                  |                         |                  |
| <b>No. (%) of patients who died during the observation period</b> | 280<br>(10.70)                                                                                                             | 278<br>(7.99)    | 273<br>(10.44)             | 274<br>(8.04)    | 254<br>(10.16)                             | 267<br>(8.05)    | 236<br>(10.12)                     | 253<br>(8.07)    | 27<br>(17.65)            | 29<br>(9.42)     | 209<br>(13.85)                         | 207<br>(9.82)    | 86<br>(33.99)                                | 94<br>(27.25)    | 260<br>(9.76)           | 262<br>(7.83)    |
| <b>Age at death, mean (SD), y</b>                                 | 53.30<br>(17.65)                                                                                                           | 51.48<br>(16.70) | 53.46<br>(17.73)           | 51.73<br>(16.61) | 53.46<br>(17.69)                           | 51.63<br>(16.72) | 53.69<br>(17.59)                   | 51.55<br>(16.73) | 45.86<br>(16.64)         | 43.07<br>(12.40) | 57.54<br>(16.83)                       | 55.40<br>(16.25) | 62.92<br>(15.33)                             | 60.85<br>(15.24) | 51.87<br>(17.34)        | 51.00<br>(16.61) |

Abbreviations: OAs, oral antipsychotics; LAIAs, long-acting injectable antipsychotics; ED, emergency department; SD, standard deviation

**eTable 7.** Patient Characteristics by Schizophrenia Cohort

| Patient characteristics                                           | Individuals prescribed both OAs and LAIAs, with at least one of the following outcome events during the observation period |                  |                            |                  |                                            |                  |                                    |                  |                          |                  |                                        |                  |                                              |                  |                         |                  |
|-------------------------------------------------------------------|----------------------------------------------------------------------------------------------------------------------------|------------------|----------------------------|------------------|--------------------------------------------|------------------|------------------------------------|------------------|--------------------------|------------------|----------------------------------------|------------------|----------------------------------------------|------------------|-------------------------|------------------|
|                                                                   | Primary outcomes                                                                                                           |                  |                            |                  |                                            |                  |                                    |                  |                          |                  | Secondary outcomes                     |                  |                                              |                  |                         |                  |
|                                                                   | All-cause ED visits                                                                                                        |                  | All-cause hospitalizations |                  | Hospitalizations for psychiatric disorders |                  | Hospitalizations for schizophrenia |                  | Incident suicide attempt |                  | Hospitalizations for somatic disorders |                  | Hospitalizations for cardiovascular diseases |                  | Extrapyramidal symptoms |                  |
|                                                                   | Incident cohort                                                                                                            | Prevalent cohort | Incident cohort            | Prevalent cohort | Incident cohort                            | Prevalent cohort | Incident cohort                    | Prevalent cohort | Incident cohort          | Prevalent cohort | Incident cohort                        | Prevalent cohort | Incident cohort                              | Prevalent cohort | Incident cohort         | Prevalent cohort |
| <b>No. of patients</b>                                            | 8873                                                                                                                       | 13140            | 8477                       | 12496            | 7925                                       | 11358            | 7459                               | 10926            | 576                      | 877              | 5430                                   | 9966             | 986                                          | 2724             | 9099                    | 13083            |
| <b>Sex, No. (%)</b>                                               |                                                                                                                            |                  |                            |                  |                                            |                  |                                    |                  |                          |                  |                                        |                  |                                              |                  |                         |                  |
| <b>Female</b>                                                     | 4562<br>(51.41)                                                                                                            | 5989<br>(45.58)  | 4385<br>(51.73)            | 5725<br>(45.81)  | 4112<br>(51.89)                            | 5205<br>(45.83)  | 3869<br>(51.87)                    | 4990<br>(45.67)  | 264<br>(45.83)           | 349<br>(39.79)   | 2784<br>(51.27)                        | 4636<br>(46.52)  | 480<br>(48.68)                               | 1173<br>(43.06)  | 4698<br>(51.63)         | 5948<br>(45.46)  |
| <b>Male</b>                                                       | 4311<br>(48.59)                                                                                                            | 7151<br>(54.42)  | 4092<br>(48.27)            | 6771<br>(54.19)  | 3813<br>(48.11)                            | 6153<br>(54.17)  | 3590<br>(48.13)                    | 5936<br>(54.33)  | 312<br>(54.17)           | 528<br>(60.21)   | 2646<br>(48.73)                        | 5330<br>(53.48)  | 506<br>(51.32)                               | 1551<br>(56.94)  | 4401<br>(48.37)         | 7135<br>(54.54)  |
| <b>Age, mean (SD), y</b>                                          |                                                                                                                            |                  |                            |                  |                                            |                  |                                    |                  |                          |                  |                                        |                  |                                              |                  |                         |                  |
| <b>At first schizophrenia diagnosis</b>                           | 39.11<br>(13.64)                                                                                                           | 38.77<br>(12.22) | 39.16<br>(13.70)           | 38.80<br>(12.33) | 38.76<br>(13.65)                           | 38.35<br>(12.30) | 38.74<br>(13.67)                   | 38.46<br>(12.29) | 33.99<br>(11.56)         | 32.88<br>(10.37) | 41.37<br>(14.39)                       | 40.18<br>(12.58) | 50.44<br>(13.83)                             | 46.28<br>(12.41) | 39.00<br>(13.21)        | 38.45<br>(11.93) |
| <b>At cohort entry</b>                                            | 39.11<br>(13.64)                                                                                                           | 43.48<br>(12.09) | 39.16<br>(13.70)           | 43.51<br>(12.21) | 38.76<br>(13.65)                           | 43.09<br>(12.22) | 38.74<br>(13.67)                   | 43.22<br>(12.21) | 33.99<br>(11.56)         | 37.42<br>(10.57) | 41.37<br>(14.39)                       | 44.95<br>(12.42) | 50.44<br>(13.83)                             | 51.16<br>(11.99) | 39.00<br>(13.21)        | 43.15<br>(11.79) |
| <b>At time of event</b>                                           | 43.88<br>(14.50)                                                                                                           | 49.81<br>(12.95) | 46.05<br>(15.87)           | 53.29<br>(13.99) | 42.64<br>(14.80)                           | 50.44<br>(13.62) | 43.26<br>(14.98)                   | 51.01<br>(13.49) | 37.99<br>(11.96)         | 43.35<br>(11.76) | 52.24<br>(15.89)                       | 57.55<br>(13.49) | 60.62<br>(13.72)                             | 62.94<br>(11.88) | 39.74<br>(13.16)        | 45.14<br>(12.15) |
| <b>Death</b>                                                      |                                                                                                                            |                  |                            |                  |                                            |                  |                                    |                  |                          |                  |                                        |                  |                                              |                  |                         |                  |
| <b>No. (%) of patients who died during the observation period</b> | 950<br>(10.71)                                                                                                             | 2562<br>(19.50)  | 918<br>(10.83)             | 2461<br>(19.69)  | 825<br>(10.41)                             | 2178<br>(19.18)  | 778<br>(10.43)                     | 2089<br>(19.12)  | 74<br>(12.85)            | 162<br>(18.47)   | 757<br>(13.94)                         | 2257<br>(22.65)  | 343<br>(34.79)                               | 1154<br>(42.36)  | 883<br>(9.70)           | 2431<br>(18.58)  |
| <b>Age at death, mean (SD), y</b>                                 | 55.18<br>(17.04)                                                                                                           | 61.55<br>(13.59) | 55.46<br>(17.04)           | 61.85<br>(13.57) | 55.15<br>(17.38)                           | 61.76<br>(13.78) | 55.39<br>(17.20)                   | 62.08<br>(13.62) | 45.08<br>(15.07)         | 50.31<br>(12.34) | 58.82<br>(15.87)                       | 63.08<br>(12.97) | 63.62<br>(14.33)                             | 66.43<br>(11.68) | 53.88<br>(16.65)        | 60.76<br>(13.50) |

Abbreviations: OAs, oral antipsychotics; LAIAs, long-acting injectable antipsychotics; ED, emergency department; SD, standard deviation

**eTable 8.** Patient Characteristics by Length of Follow-up

| Patient characteristics                                           | Individuals prescribed both OAs and LAIAs, with at least one of the following outcome events during the observation period |                  |                            |                  |                                            |                  |                                    |                  |                          |                  |                                        |                  |                                              |                  |                         |                  |
|-------------------------------------------------------------------|----------------------------------------------------------------------------------------------------------------------------|------------------|----------------------------|------------------|--------------------------------------------|------------------|------------------------------------|------------------|--------------------------|------------------|----------------------------------------|------------------|----------------------------------------------|------------------|-------------------------|------------------|
|                                                                   | Primary outcomes                                                                                                           |                  |                            |                  |                                            |                  |                                    |                  |                          |                  | Secondary outcomes                     |                  |                                              |                  |                         |                  |
|                                                                   | All-cause ED visits                                                                                                        |                  | All-cause hospitalizations |                  | Hospitalizations for psychiatric disorders |                  | Hospitalizations for schizophrenia |                  | Incident suicide attempt |                  | Hospitalizations for somatic disorders |                  | Hospitalizations for cardiovascular diseases |                  | Extrapyramidal symptoms |                  |
|                                                                   | ≥ 10 years                                                                                                                 | < 10 years       | ≥ 10 years                 | < 10 years       | ≥ 10 years                                 | < 10 years       | ≥ 10 years                         | < 10 years       | ≥ 10 years               | < 10 years       | ≥ 10 years                             | < 10 years       | ≥ 10 years                                   | < 10 years       | ≥ 10 years              | < 10 years       |
| <b>No. of patients</b>                                            | 16399                                                                                                                      | 5614             | 15629                      | 5344             | 14416                                      | 4867             | 13842                              | 4543             | 1177                     | 276              | 11955                                  | 3441             | 2820                                         | 890              | 16484                   | 5698             |
| <b>Sex, No. (%)</b>                                               |                                                                                                                            |                  |                            |                  |                                            |                  |                                    |                  |                          |                  |                                        |                  |                                              |                  |                         |                  |
| <b>Female</b>                                                     | 7873<br>(48.01)                                                                                                            | 2678<br>(47.70)  | 7542<br>(48.26)            | 2568<br>(48.05)  | 6959<br>(48.27)                            | 2358<br>(48.45)  | 6667<br>(48.17)                    | 2192<br>(48.25)  | 502<br>(42.65)           | 111<br>(40.22)   | 5836<br>(48.82)                        | 1584<br>(46.03)  | 1278<br>(45.32)                              | 375<br>(42.13)   | 7887<br>(47.85)         | 2759<br>(48.42)  |
| <b>Male</b>                                                       | 8526<br>(51.99)                                                                                                            | 2936<br>(52.30)  | 8087<br>(51.74)            | 2776<br>(51.95)  | 7457<br>(51.73)                            | 2509<br>(51.55)  | 7175<br>(51.83)                    | 2351<br>(51.75)  | 675<br>(57.35)           | 165<br>(59.78)   | 6119<br>(51.18)                        | 1857<br>(53.97)  | 1542<br>(54.68)                              | 515<br>(57.87)   | 8597<br>(52.15)         | 2939<br>(51.58)  |
| <b>Age, mean (SD), y</b>                                          |                                                                                                                            |                  |                            |                  |                                            |                  |                                    |                  |                          |                  |                                        |                  |                                              |                  |                         |                  |
| <b>At first schizophrenia diagnosis</b>                           | 38.15<br>(11.97)                                                                                                           | 41.13<br>(14.78) | 38.12<br>(12.06)           | 41.36<br>(14.83) | 37.78<br>(12.11)                           | 40.69<br>(14.69) | 37.87<br>(12.11)                   | 40.71<br>(14.74) | 33.01<br>(10.73)         | 34.62<br>(11.34) | 39.46<br>(12.38)                       | 44.58<br>(15.30) | 45.71<br>(12.17)                             | 52.71<br>(13.82) | 38.01<br>(11.76)        | 40.60<br>(14.15) |
| <b>At cohort entry</b>                                            | 41.52<br>(11.93)                                                                                                           | 42.30<br>(15.43) | 41.50<br>(12.04)           | 42.52<br>(15.48) | 41.17<br>(12.12)                           | 41.74<br>(15.30) | 41.27<br>(12.13)                   | 41.79<br>(15.36) | 36.10<br>(10.92)         | 35.88<br>(11.84) | 42.97<br>(12.28)                       | 46.18<br>(15.96) | 49.54<br>(11.65)                             | 55.48<br>(13.98) | 41.36<br>(11.71)        | 41.70<br>(14.73) |
| <b>At time of event</b>                                           | 48.20<br>(13.16)                                                                                                           | 47.25<br>(16.51) | 51.27<br>(14.48)           | 49.59<br>(16.98) | 48.26<br>(13.94)                           | 45.42<br>(16.64) | 48.90<br>(13.87)                   | 46.27<br>(16.77) | 41.84<br>(12.06)         | 38.62<br>(12.05) | 56.16<br>(14.01)                       | 55.50<br>(15.92) | 62.11<br>(11.97)                             | 63.26<br>(13.56) | 43.36<br>(12.31)        | 41.56<br>(14.52) |
| <b>Death</b>                                                      |                                                                                                                            |                  |                            |                  |                                            |                  |                                    |                  |                          |                  |                                        |                  |                                              |                  |                         |                  |
| <b>No. (%) of patients who died during the observation period</b> | 1501<br>(9.15)                                                                                                             | 2011<br>(35.82)  | 1470<br>(9.41)             | 1909<br>(35.72)  | 1384<br>(9.60)                             | 1619<br>(33.26)  | 1341<br>(9.69)                     | 1526<br>(33.59)  | 103<br>(8.75)            | 133<br>(48.19)   | 1394<br>(11.66)                        | 1620<br>(47.08)  | 801<br>(28.40)                               | 696<br>(78.20)   | 1414<br>(8.58)          | 1900<br>(33.35)  |
| <b>Age at death, mean (SD), y</b>                                 | 64.30<br>(12.43)                                                                                                           | 56.49<br>(15.66) | 64.41<br>(12.48)           | 56.81<br>(15.69) | 64.41<br>(12.57)                           | 56.13<br>(16.09) | 64.51<br>(12.51)                   | 56.54<br>(15.94) | 55.00<br>(11.77)         | 43.76<br>(12.62) | 65.02<br>(12.26)                       | 59.43<br>(14.66) | 67.40<br>(11.41)                             | 63.92<br>(13.18) | 63.81<br>(12.30)        | 55.30<br>(15.32) |

Abbreviations: OAs, oral antipsychotics; LAIAs, long-acting injectable antipsychotics; ED, emergency department; SD, standard deviation

**eTable 9.** Patient Characteristics by Substance Use

| Patient characteristics                                           | Individuals prescribed both OAs and LAIAs, with at least one of the following outcome events during the observation period |                    |                            |                    |                                            |                    |                                    |                    |                          |                    |                                        |                    |                                              |                    |                         |                    |
|-------------------------------------------------------------------|----------------------------------------------------------------------------------------------------------------------------|--------------------|----------------------------|--------------------|--------------------------------------------|--------------------|------------------------------------|--------------------|--------------------------|--------------------|----------------------------------------|--------------------|----------------------------------------------|--------------------|-------------------------|--------------------|
|                                                                   | Primary outcomes                                                                                                           |                    |                            |                    |                                            |                    |                                    |                    |                          |                    | Secondary outcomes                     |                    |                                              |                    |                         |                    |
|                                                                   | All-cause ED visits                                                                                                        |                    | All-cause hospitalizations |                    | Hospitalizations for psychiatric disorders |                    | Hospitalizations for schizophrenia |                    | Incident suicide attempt |                    | Hospitalizations for somatic disorders |                    | Hospitalizations for cardiovascular diseases |                    | Extrapyramidal symptoms |                    |
|                                                                   | Without substance use                                                                                                      | With substance use | Without substance use      | With substance use | Without substance use                      | With substance use | Without substance use              | With substance use | Without substance use    | With substance use | Without substance use                  | With substance use | Without substance use                        | With substance use | Without substance use   | With substance use |
| <b>No. of patients</b>                                            | 19816                                                                                                                      | 2197               | 18819                      | 2154               | 17189                                      | 2094               | 16490                              | 1895               | 812                      | 641                | 13694                                  | 1702               | 3464                                         | 246                | 20020                   | 2162               |
| <b>Sex, No. (%)</b>                                               |                                                                                                                            |                    |                            |                    |                                            |                    |                                    |                    |                          |                    |                                        |                    |                                              |                    |                         |                    |
| <b>Female</b>                                                     | 9859<br>(49.75)                                                                                                            | 692<br>(31.50)     | 9429<br>(50.10)            | 681<br>(31.62)     | 8651<br>(50.33)                            | 666<br>(31.81)     | 8254<br>(50.05)                    | 605<br>(31.93)     | 432<br>(53.20)           | 181<br>(28.24)     | 6869<br>(50.16)                        | 551<br>(32.37)     | 1570<br>(45.32)                              | 83<br>(33.74)      | 9972<br>(49.81)         | 674<br>(31.17)     |
| <b>Male</b>                                                       | 9957<br>(50.25)                                                                                                            | 1505<br>(68.50)    | 9390<br>(49.90)            | 1473<br>(68.38)    | 8538<br>(49.67)                            | 1428<br>(68.19)    | 8236<br>(49.95)                    | 1290<br>(68.07)    | 380<br>(46.80)           | 460<br>(71.76)     | 6825<br>(49.84)                        | 1151<br>(67.63)    | 1894<br>(54.68)                              | 163<br>(66.26)     | 10048<br>(50.19)        | 1488<br>(68.83)    |
| <b>Age, mean (SD), y</b>                                          |                                                                                                                            |                    |                            |                    |                                            |                    |                                    |                    |                          |                    |                                        |                    |                                              |                    |                         |                    |
| <b>At first schizophrenia diagnosis</b>                           | 39.71<br>(12.89)                                                                                                           | 31.66<br>(9.38)    | 39.78<br>(12.98)           | 31.62<br>(9.39)    | 39.38<br>(12.98)                           | 31.46<br>(9.27)    | 39.40<br>(12.97)                   | 31.35<br>(9.22)    | 35.26<br>(11.58)         | 30.85<br>(9.33)    | 41.69<br>(13.25)                       | 31.89<br>(9.61)    | 48.11<br>(12.75)                             | 37.17<br>(10.98)   | 39.44<br>(12.53)        | 31.63<br>(9.29)    |
| <b>At cohort entry</b>                                            | 42.61<br>(12.95)                                                                                                           | 33.63<br>(9.38)    | 42.69<br>(13.04)           | 33.61<br>(9.40)    | 42.27<br>(13.06)                           | 33.46<br>(9.29)    | 42.32<br>(13.06)                   | 33.39<br>(9.27)    | 38.23<br>(11.69)         | 33.31<br>(9.61)    | 44.89<br>(13.15)                       | 34.05<br>(9.66)    | 51.73<br>(12.26)                             | 40.25<br>(11.02)   | 42.29<br>(12.57)        | 33.61<br>(9.28)    |
| <b>At time of event</b>                                           | 49.68<br>(13.71)                                                                                                           | 40.04<br>(10.39)   | 52.84<br>(14.80)           | 39.84<br>(10.85)   | 49.67<br>(14.59)                           | 38.76<br>(10.22)   | 49.93<br>(14.52)                   | 39.48<br>(10.32)   | 43.76<br>(12.63)         | 38.02<br>(10.62)   | 57.66<br>(13.86)                       | 42.73<br>(11.75)   | 63.05<br>(12.13)                             | 51.05<br>(11.04)   | 43.90<br>(12.91)        | 35.70<br>(9.59)    |
| <b>Death</b>                                                      |                                                                                                                            |                    |                            |                    |                                            |                    |                                    |                    |                          |                    |                                        |                    |                                              |                    |                         |                    |
| <b>No. (%) of patients who died during the observation period</b> | 3218<br>(16.24)                                                                                                            | 294<br>(13.38)     | 3089<br>(16.41)            | 290<br>(13.46)     | 2724<br>(15.85)                            | 279<br>(13.32)     | 2626<br>(15.92)                    | 241<br>(12.72)     | 120<br>(14.78)           | 116<br>(18.10)     | 2764<br>(20.18)                        | 250<br>(14.69)     | 1423<br>(41.08)                              | 74<br>(30.08)      | 3026<br>(15.11)         | 288<br>(13.32)     |
| <b>Age at death, mean (SD), y</b>                                 | 61.16<br>(14.35)                                                                                                           | 45.24<br>(12.59)   | 61.51<br>(14.29)           | 45.25<br>(12.56)   | 61.47<br>(14.55)                           | 45.01<br>(12.44)   | 61.60<br>(14.47)                   | 45.71<br>(12.48)   | 51.64<br>(13.68)         | 45.59<br>(12.53)   | 63.42<br>(13.12)                       | 46.43<br>(12.44)   | 66.48<br>(12.00)                             | 52.46<br>(12.18)   | 60.25<br>(14.22)        | 45.00<br>(12.54)   |

Abbreviations: OAs, oral antipsychotics; LAIAs, long-acting injectable antipsychotics; ED, emergency department; SD, standard deviation

**eTable 10.** Sensitivity Analysis by Restricting the Age Range of Early/Late LAIAs Initiators

| Outcome events                               | Full treatment periods             |         |                                    |         |
|----------------------------------------------|------------------------------------|---------|------------------------------------|---------|
|                                              | Early LAIAs initiators             |         | Late LAIAs initiators              |         |
|                                              | Adjusted <sup>#</sup> IRR (95% CI) | P value | Adjusted <sup>#</sup> IRR (95% CI) | P value |
| All-cause ED visits                          | 0.71 (0.65, 0.78)                  | <0.001  | 0.95 (0.89, 1.01)                  | 0.11    |
| All-cause hospitalizations                   | 0.32 (0.28, 0.37)                  | <0.001  | 0.51 (0.46, 0.57)                  | <0.001  |
| Hospitalizations for psychiatric disorders   | 0.28 (0.24, 0.33)                  | <0.001  | 0.45 (0.40, 0.51)                  | <0.001  |
| Hospitalizations for schizophrenia           | 0.28 (0.23, 0.33)                  | <0.001  | 0.45 (0.39, 0.52)                  | <0.001  |
| Incident suicide attempt                     | 0.36 (0.15, 0.85)                  | 0.02    | 0.63 (0.28, 1.39)                  | 0.25    |
| Hospitalizations for somatic disorders       | 0.64 (0.49, 0.84)                  | 0.001   | 0.76 (0.63, 0.91)                  | 0.003   |
| Hospitalizations for cardiovascular diseases | 1.00 (0.38, 2.61)                  | 0.99    | 1.11 (0.53, 2.32)                  | 0.78    |
| Extrapyramidal symptoms                      | 0.41 (0.34, 0.49)                  | <0.001  | 1.09 (0.95, 1.25)                  | 0.35    |

| Outcome events                               | Subsequent treatment periods*      |         |                                    |         |
|----------------------------------------------|------------------------------------|---------|------------------------------------|---------|
|                                              | Early LAIAs initiators             |         | Late LAIAs initiators              |         |
|                                              | Adjusted <sup>#</sup> IRR (95% CI) | P value | Adjusted <sup>#</sup> IRR (95% CI) | P value |
| All-cause ED visits                          | 0.64 (0.57, 0.72)                  | <0.001  | 0.94 (0.87, 1.02)                  | 0.13    |
| All-cause hospitalizations                   | 0.31 (0.26, 0.39)                  | <0.001  | 0.45 (0.39, 0.52)                  | <0.001  |
| Hospitalizations for psychiatric disorders   | 0.28 (0.22, 0.35)                  | <0.001  | 0.40 (0.34, 0.48)                  | <0.001  |
| Hospitalizations for schizophrenia           | 0.29 (0.23, 0.38)                  | <0.001  | 0.40 (0.33, 0.48)                  | <0.001  |
| Incident suicide attempt                     | 0.31 (0.06, 1.65)                  | 0.17    | 0.26 (0.06, 1.18)                  | 0.08    |
| Hospitalizations for somatic disorders       | 0.56 (0.39, 0.82)                  | 0.002   | 0.68 (0.53, 0.86)                  | 0.002   |
| Hospitalizations for cardiovascular diseases | 1.12 (0.47, 2.67)                  | 0.67    | 1.08 (0.51, 2.29)                  | 0.82    |
| Extrapyramidal symptoms                      | 0.38 (0.24, 0.60)                  | <0.001  | 0.52 (0.35, 0.79)                  | 0.002   |

Note: The method has been described in eMethod – Sensitivity analysis 10.

Abbreviations: IRR, incidence rate ratio; CI, confidence interval; ED, emergency department.

\*Beyond the first 90 days in each treatment period

#Adjusted for age (1-year bands) and season (cut by the first date of March, May, September, and November)



**eTable 11.** Results From E-Value Analyses

| <b>Outcome</b>                               | <b>Adjusted<sup>#</sup><br/>IRR (95% CI)</b> | <b>P value</b> | <b>E-value</b> | <b>Upper<br/>confidence<br/>interval of<br/>E-value</b> |
|----------------------------------------------|----------------------------------------------|----------------|----------------|---------------------------------------------------------|
| All-cause emergency department visits        | 0.99 (0.97, 1.00)                            | 0.09           | 1.11           | 1                                                       |
| All-cause hospitalizations                   | 0.63 (0.61, 0.65)                            | <0.001         | 2.55           | 2.45                                                    |
| Hospitalizations for psychiatric disorders   | 0.52 (0.50, 0.53)                            | <0.001         | 3.26           | 3.18                                                    |
| Hospitalizations for schizophrenia           | 0.53 (0.51, 0.55)                            | <0.001         | 3.18           | 3.04                                                    |
| Incident suicide attempt                     | 0.56 (0.44, 0.71)                            | <0.001         | 2.97           | 2.17                                                    |
| Hospitalizations for somatic disorders       | 0.88 (0.85, 0.91)                            | <0.001         | 1.53           | 1.43                                                    |
| Hospitalizations for cardiovascular diseases | 0.88 (0.81, 0.96)                            | <0.01          | 1.53           | 1.25                                                    |
| Extrapyramidal symptoms                      | 0.86 (0.82, 0.91)                            | <0.001         | 1.60           | 1.43                                                    |

Abbreviations: IRR, incidence rate ratio; CI, confidence interval.

#Adjusted for age (1-year bands) and season (cut by the first date of March, May, September, and November)

In our study, the IRR for all-cause hospitalization was 0.63 with a 95% confidence interval of 0.61 to 0.65. The E-value for the result point estimate was 2.55 with the upper confidence interval being 2.45 in an IRR scale. The results indicate that our observed 0.63-fold decrease in the risk of all-cause hospitalization could be explained by an unmeasured time-varying confounder that was associated with both the treatment and the outcome by a risk ratio of 2.55-fold each, but weaker confounding could not do so. Similar explanations can be applied to other outcomes (except for emergency department visits). Since the confidence interval of emergency department visits includes null (IRR=1), no confounding is needed to move the confidence interval to include 1.

**eTable 12.** Results of Self-controlled Case Series Analysis for the Use of LAIAs Alone vs OAs Alone and the Risk of Outcome Events, During the First 90 Days of Treatment

| Outcome event                                | First 90 days of treatment |              |                                |                         |                                    | P value |
|----------------------------------------------|----------------------------|--------------|--------------------------------|-------------------------|------------------------------------|---------|
|                                              | Events, No.                | Person-years | Incidence per 100 person-years | Unadjusted IRR (95% CI) | Adjusted <sup>#</sup> IRR (95% CI) |         |
| <b>Primary outcomes</b>                      |                            |              |                                |                         |                                    |         |
| All-cause ED visits                          |                            |              |                                |                         |                                    |         |
| OAs alone                                    | 25 556                     | 12 743       | 200.55                         | Ref                     | Ref                                |         |
| LAIAs alone                                  | 10 951                     | 5615         | 195.01                         | 0.88 (0.86, 0.91)       | 0.89 (0.87, 0.91)                  | <0.001  |
| All-cause hospitalizations                   |                            |              |                                |                         |                                    |         |
| OAs alone                                    | 15 043                     | 12 264       | 122.66                         | Ref                     | Ref                                |         |
| LAIAs alone                                  | 4133                       | 5374         | 76.91                          | 0.54 (0.52, 0.56)       | 0.53 (0.51, 0.55)                  | <0.001  |
| Hospitalizations for psychiatric disorders   |                            |              |                                |                         |                                    |         |
| OAs alone                                    | 11 341                     | 11 516       | 98.48                          | Ref                     | Ref                                |         |
| LAIAs alone                                  | 2590                       | 4976         | 52.06                          | 0.44 (0.42, 0.46)       | 0.44 (0.42, 0.46)                  | <0.001  |
| Hospitalizations for schizophrenia           |                            |              |                                |                         |                                    |         |
| OAs alone                                    | 9142                       | 10 845       | 84.30                          | Ref                     | Ref                                |         |
| LAIAs alone                                  | 2196                       | 4727         | 46.45                          | 0.45 (0.43, 0.47)       | 0.45 (0.43, 0.47)                  | <0.001  |
| Incident suicide attempt                     |                            |              |                                |                         |                                    |         |
| OAs alone                                    | 284                        | 1595         | 17.80                          | Ref                     | Ref                                |         |
| LAIAs alone                                  | 51                         | 619          | 8.24                           | 0.39 (0.29, 0.54)       | 0.45 (0.33, 0.62)                  | <0.001  |
| <b>Secondary outcomes</b>                    |                            |              |                                |                         |                                    |         |
| Hospitalizations for somatic disorders       |                            |              |                                |                         |                                    |         |
| OAs alone                                    | 5294                       | 8495         | 62.32                          | Ref                     | Ref                                |         |
| LAIAs alone                                  | 2111                       | 3758         | 56.18                          | 0.81 (0.77, 0.85)       | 0.81 (0.77, 0.86)                  | <0.001  |
| Hospitalizations for cardiovascular diseases |                            |              |                                |                         |                                    |         |
| OAs alone                                    | 800                        | 2315         | 34.56                          | Ref                     | Ref                                |         |
| LAIAs alone                                  | 362                        | 1078         | 33.57                          | 0.84 (0.73, 0.96)       | 0.88 (0.77, 1.01)                  | 0.07    |
| Extrapyramidal symptoms                      |                            |              |                                |                         |                                    |         |
| OAs alone                                    | 11 524                     | 15 861       | 72.66                          | Ref                     | Ref                                |         |
| LAIAs alone                                  | 3559                       | 6518         | 54.61                          | 0.62 (0.60, 0.65)       | 0.80 (0.76, 0.84)                  | <0.001  |

**eTable 13.** Results of Self-controlled Case Series Analysis for the Full Treatment Period of OAs Alone, Full Treatment Period of LAIAs Alone, and Full Treatment Period of the Combination Use of OAs Plus LAIAs vs Baseline Period or Preexposure Period, and the Risk of Outcome Events

| Full treatment period                      |             |              |                                |                                    |         |                                    |         |
|--------------------------------------------|-------------|--------------|--------------------------------|------------------------------------|---------|------------------------------------|---------|
| Outcome event                              | Events, No. | Person-years | Incidence per 100 person-years | Compared with baseline             |         | Compared with preexposure period   |         |
|                                            |             |              |                                | Adjusted <sup>#</sup> IRR (95% CI) | P value | Adjusted <sup>#</sup> IRR (95% CI) | P value |
| <b>Primary outcomes</b>                    |             |              |                                |                                    |         |                                    |         |
| All-cause ED visits                        |             |              |                                |                                    |         |                                    |         |
| Baseline                                   | 20 292      | 29 988       | 67.67                          | Ref                                | Ref     | 0.25 (0.24, 0.25)                  | <0.001  |
| Preexposure to antipsychotics              | 14 253      | 3881         | 367.27                         | 4.05 (3.95, 4.14)                  | <0.001  | Ref                                | Ref     |
| OAs alone                                  | 127 994     | 104 099      | 122.95                         | 1.76 (1.72, 1.79)                  | <0.001  | 0.43 (0.43, 0.44)                  | <0.001  |
| LAIAs alone                                | 37 564      | 29 971       | 125.33                         | 1.71 (1.67, 1.74)                  | <0.001  | 0.42 (0.41, 0.43)                  | <0.001  |
| Combination use of OAs plus LAIAs          | 106 522     | 92 278       | 115.44                         | 1.78 (1.75, 1.82)                  | <0.001  | 0.44 (0.43, 0.45)                  | <0.001  |
| All-cause hospitalizations                 |             |              |                                |                                    |         |                                    |         |
| Baseline                                   | 5377        | 28 786       | 18.68                          | Ref                                | Ref     | 0.08 (0.07, 0.08)                  | <0.001  |
| Preexposure to antipsychotics              | 9715        | 3738         | 259.91                         | 13.01 (12.55, 13.49)               | <0.001  | Ref                                | Ref     |
| OAs alone                                  | 65 377      | 100 735      | 64.90                          | 4.05 (3.92, 4.19)                  | <0.001  | 0.31 (0.30, 0.32)                  | <0.001  |
| LAIAs alone                                | 12 592      | 28 287       | 44.52                          | 2.51 (2.42, 2.61)                  | <0.001  | 0.19 (0.19, 0.20)                  | <0.001  |
| Combination use of OAs plus LAIAs          | 40 943      | 84 615       | 48.39                          | 3.15 (3.05, 3.27)                  | <0.001  | 0.24 (0.24, 0.25)                  | <0.001  |
| Hospitalizations for psychiatric disorders |             |              |                                |                                    |         |                                    |         |
| Baseline                                   | 1564        | 26 561       | 5.89                           | Ref                                | Ref     | 0.03 (0.02, 0.03)                  | <0.001  |
| Preexposure to antipsychotics              | 8268        | 3516         | 235.16                         | 39.50 (37.29, 41.84)               | <0.001  | Ref                                | Ref     |
| OAs alone                                  | 40 010      | 94 317       | 42.42                          | 10.15 (9.59, 10.74)                | <0.001  | 0.26 (0.25, 0.26)                  | <0.001  |
| LAIAs alone                                | 6373        | 2568         | 24.82                          | 5.13 (4.82, 5.46)                  | <0.001  | 0.13 (0.13, 0.13)                  | <0.001  |
| Combination use of OAs plus LAIAs          | 23 857      | 72 893       | 32.73                          | 7.97 (7.52, 8.44)                  | <0.001  | 0.20 (0.20, 0.21)                  | <0.001  |
| Hospitalizations for schizophrenia         |             |              |                                |                                    |         |                                    |         |
| Baseline                                   | 1123        | 24 484       | 4.59                           | Ref                                | Ref     | 0.02 (0.02, 0.02)                  | <0.001  |
| Preexposure to antipsychotics              | 6837        | 3295         | 207.47                         | 47.39 (44.31, 50.67)               | <0.001  | Ref                                | Ref     |
| OAs alone                                  | 33 436      | 89 539       | 37.34                          | 11.41 (10.67, 12.19)               | <0.001  | 0.24 (0.23, 0.25)                  | <0.001  |
| LAIAs alone                                | 5499        | 24 372       | 22.56                          | 5.88 (5.48, 6.32)                  | <0.001  | 0.12 (0.12, 0.13)                  | <0.001  |
| Combination use of OAs plus LAIAs          | 21 206      | 70 387       | 30.13                          | 9.04 (8.45, 9.67)                  | <0.001  | 0.19 (0.18, 0.20)                  | <0.001  |
| Incident suicide attempt                   |             |              |                                |                                    |         |                                    |         |
| Baseline                                   | 51          | 2212         | 2.31                           | Ref                                | Ref     | 0.07 (0.05, 0.10)                  | <0.001  |

|                                              |        |         |       |  |                      |        |                   |        |
|----------------------------------------------|--------|---------|-------|--|----------------------|--------|-------------------|--------|
| Preexposure to antipsychotics                | 95     | 453     | 20.98 |  | 14.28 (9.89, 20.62)  | <0.001 | Ref               | Ref    |
| OAs alone                                    | 738    | 8706    | 8.48  |  | 7.60 (5.46, 10.58)   | <0.001 | 0.53 (0.42, 0.67) | <0.001 |
| LAIAs alone                                  | 121    | 2165    | 5.59  |  | 4.26 (2.92, 6.22)    | <0.001 | 0.30 (0.22, 0.40) | <0.001 |
| Combination use of OAs plus LAIAs            | 448    | 5781    | 7.75  |  | 7.33 (5.21, 10.32)   | <0.001 | 0.51 (0.40, 0.66) | <0.001 |
| <b>Secondary outcomes</b>                    |        |         |       |  |                      |        |                   |        |
| Hospitalizations for somatic disorders       |        |         |       |  |                      |        |                   |        |
| Baseline                                     | 4462   | 17 739  | 25.15 |  | Ref                  | Ref    | 0.26 (0.25, 0.27) | <0.001 |
| Preexposure to antipsychotics                | 2385   | 2498    | 95.49 |  | 3.85 (3.65, 4.06)    | <0.001 | Ref               | Ref    |
| OAs alone                                    | 34 526 | 71 395  | 48.36 |  | 1.99 (1.91, 2.07)    | <0.001 | 0.52 (0.49, 0.54) | <0.001 |
| LAIAs alone                                  | 8189   | 19 745  | 41.47 |  | 1.73 (1.65, 1.82)    | <0.001 | 0.45 (0.43, 0.47) | <0.001 |
| Combination use of OAs plus LAIAs            | 22 961 | 63 596  | 36.1  |  | 1.64 (1.57, 1.71)    | <0.001 | 0.43 (0.41, 0.45) | <0.001 |
| Hospitalizations for cardiovascular diseases |        |         |       |  |                      |        |                   |        |
| Baseline                                     | 726    | 5124    | 14.17 |  | Ref                  | Ref    | 0.17 (0.15, 0.20) | <0.001 |
| Preexposure to antipsychotics                | 481    | 638     | 75.38 |  | 5.78 (5.10, 6.54)    | <0.001 | Ref               | Ref    |
| OAs alone                                    | 5746   | 21830   | 26.32 |  | 2.09 (1.89, 2.32)    | <0.001 | 0.36 (0.33, 0.40) | <0.001 |
| LAIAs alone                                  | 1392   | 6171    | 22.56 |  | 1.83 (1.63, 2.06)    | <0.001 | 0.32 (0.28, 0.36) | <0.001 |
| Combination use of OAs plus LAIAs            | 3778   | 2055    | 18.38 |  | 1.73 (1.55, 1.93)    | <0.001 | 0.30 (0.27, 0.33) | <0.001 |
| Extrapyramidal symptoms                      |        |         |       |  |                      |        |                   |        |
| Baseline                                     | 462    | 29 566  | 1.56  |  | Ref                  | Ref    | 0.11 (0.09, 0.12) | <0.001 |
| Preexposure to antipsychotics                | 384    | 4252    | 9.03  |  | 9.30 (8.08, 10.71)   | <0.001 | Ref               | Ref    |
| OAs alone                                    | 15 889 | 112 797 | 14.09 |  | 32.68 (29.47, 36.24) | <0.001 | 3.51 (3.17, 3.90) | <0.001 |
| LAIAs alone                                  | 4042   | 32 482  | 12.44 |  | 28.17 (25.29, 31.38) | <0.001 | 3.03 (2.72, 3.37) | <0.001 |
| Combination use of OAs plus LAIAs            | 13 207 | 101 159 | 13.06 |  | 52.38 (47.18, 58.15) | <0.001 | 5.63 (5.07, 6.25) | <0.001 |

Note: The preexposure period was defined as the 30 days before any antipsychotic treatment, and the baseline period was defined as the non-treatment period except the preexposure period.

Abbreviations: OAs, oral antipsychotics; LAIAs, long-acting injectable antipsychotics; IRR, incidence rate ratio; CI, confidence interval; ED, emergency department.

#Adjusted for age (1-year bands) and season (cut by the first date of March, May, September, and November)

**eTable 14.** Results of Self-controlled Case Series Analysis for the First 90 Days of OAs Alone, the Subsequent Use of OAs Alone, the First 90 Days of LAIAs Alone, the Subsequent Use of LAIAs Alone, the First 90 Days of OAs plus LAIAs, the Subsequent Use of OAs Plus LAIAs vs Baseline Period or Preexposure Period, and the Risk of Outcome Events

| First 90 days of antipsychotic treatment and the subsequent treatment period* |             |              |                                |                                    |         |                                    |         |
|-------------------------------------------------------------------------------|-------------|--------------|--------------------------------|------------------------------------|---------|------------------------------------|---------|
| Outcome event                                                                 | Events, No. | Person-years | Incidence per 100 person-years | Compared with baseline             |         | Compared with preexposure period   |         |
|                                                                               |             |              |                                | Adjusted <sup>#</sup> IRR (95% CI) | P value | Adjusted <sup>#</sup> IRR (95% CI) | P value |
| <b>Primary outcomes</b>                                                       |             |              |                                |                                    |         |                                    |         |
| All-cause ED visits                                                           |             |              |                                |                                    |         |                                    |         |
| Baseline                                                                      | 20 292      | 29 988       | 67.67                          | Ref                                | Ref     | 0.24 (0.24, 0.25)                  | <0.001  |
| Preexposure to antipsychotics                                                 | 14 253      | 3881         | 367.27                         | 4.09 (3.99, 4.18)                  | <0.001  | Ref                                | Ref     |
| First 90 days of OAs alone                                                    | 25 556      | 12 743       | 200.55                         | 2.33 (2.28, 2.38)                  | <0.001  | 0.57 (0.56, 0.58)                  | <0.001  |
| Subsequent use of OAs alone                                                   | 102 438     | 91 355       | 112.13                         | 1.54 (1.51, 1.57)                  | <0.001  | 0.38 (0.37, 0.38)                  | <0.001  |
| First 90 days of LAIAs alone                                                  | 10 951      | 5615         | 195.01                         | 2.04 (1.99, 2.09)                  | <0.001  | 0.50 (0.49, 0.51)                  | <0.001  |
| Subsequent use of LAIAs alone                                                 | 26 613      | 24 356       | 109.27                         | 1.49 (1.46, 1.53)                  | <0.001  | 0.37 (0.36, 0.37)                  | <0.001  |
| First 90 days of OAs plus LAIAs                                               | 21 836      | 11 061       | 197.41                         | 2.29 (2.24, 2.34)                  | <0.001  | 0.56 (0.55, 0.57)                  | <0.001  |
| Subsequent use of OAs plus LAIAs                                              | 84 686      | 81 217       | 104.27                         | 1.55 (1.52, 1.58)                  | <0.001  | 0.38 (0.37, 0.39)                  | <0.001  |
| All-cause hospitalizations                                                    |             |              |                                |                                    |         |                                    |         |
| Baseline                                                                      | 5377        | 28 786       | 18.68                          | Ref                                | Ref     | 0.08 (0.07, 0.08)                  | <0.001  |
| Preexposure to antipsychotics                                                 | 9715        | 3738         | 259.91                         | 13.18 (12.72, 13.67)               | <0.001  | Ref                                | Ref     |
| First 90 days of OAs alone                                                    | 15 043      | 12 264       | 122.66                         | 6.80 (6.57, 7.05)                  | <0.001  | 0.52 (0.50, 0.53)                  | <0.001  |
| Subsequent use of OAs alone                                                   | 50 334      | 88 470       | 56.89                          | 3.10 (3.00, 3.21)                  | <0.001  | 0.24 (0.23, 0.24)                  | <0.001  |
| First 90 days of LAIAs alone                                                  | 4133        | 5374         | 76.91                          | 3.58 (3.42, 3.74)                  | <0.001  | 0.27 (0.26, 0.28)                  | <0.001  |
| Subsequent use of LAIAs alone                                                 | 8459        | 22 913       | 36.92                          | 1.94 (1.86, 2.02)                  | <0.001  | 0.15 (0.14, 0.15)                  | <0.001  |
| First 90 days of OAs plus LAIAs                                               | 10 784      | 10 421       | 103.48                         | 5.27 (5.07, 5.47)                  | <0.001  | 0.40 (0.39, 0.41)                  | <0.001  |
| Subsequent use of OAs plus LAIAs                                              | 30 159      | 74 194       | 40.65                          | 2.35 (2.27, 2.43)                  | <0.001  | 0.18 (0.17, 0.18)                  | <0.001  |
| Hospitalizations for psychiatric disorders                                    |             |              |                                |                                    |         |                                    |         |
| Baseline                                                                      | 1564        | 26 561       | 5.89                           | Ref                                | Ref     | 0.03 (0.02, 0.03)                  | <0.001  |
| Preexposure to antipsychotics                                                 | 8268        | 3516         | 235.16                         | 39.92 (37.69, 42.28)               | <0.001  | Ref                                | Ref     |
| First 90 days of OAs alone                                                    | 11 341      | 11 516       | 98.48                          | 18.59 (17.54, 19.69)               | <0.001  | 0.47 (0.45, 0.48)                  | <0.001  |
| Subsequent use of OAs alone                                                   | 28 669      | 82 801       | 34.62                          | 7.00 (6.61, 7.41)                  | <0.001  | 0.18 (0.17, 0.18)                  | <0.001  |
| First 90 days of LAIAs alone                                                  | 2590        | 4976         | 52.06                          | 8.07 (7.55, 8.63)                  | <0.001  | 0.20 (0.19, 0.21)                  | <0.001  |

|                                                     |        |        |        |  |                      |        |  |                   |        |
|-----------------------------------------------------|--------|--------|--------|--|----------------------|--------|--|-------------------|--------|
| Subsequent use of LAIAs alone                       | 3783   | 20 705 | 18.27  |  | 3.44 (3.22, 3.67)    | <0.001 |  | 0.09 (0.08, 0.09) | <0.001 |
| First 90 days of OAs plus LAIAs                     | 8156   | 9454   | 86.27  |  | 14.55 (13.71, 15.44) | <0.001 |  | 0.36 (0.35, 0.38) | <0.001 |
| Subsequent use of OAs plus LAIAs                    | 15 701 | 63 440 | 24.75  |  | 5.13 (4.84, 5.45)    | <0.001 |  | 0.13 (0.12, 0.13) | <0.001 |
| <b>Hospitalizations for schizophrenia</b>           |        |        |        |  |                      |        |  |                   |        |
| Baseline                                            | 1123   | 24 484 | 4.59   |  | Ref                  | Ref    |  | 0.02 (0.02, 0.02) | <0.001 |
| Preexposure to antipsychotics                       | 6837   | 3295   | 207.47 |  | 47.85 (44.76, 51.16) | <0.001 |  | Ref               | Ref    |
| First 90 days of OAs alone                          | 9142   | 10 845 | 84.30  |  | 21.43 (20.04, 22.93) | <0.001 |  | 0.45 (0.43, 0.46) | <0.001 |
| Subsequent use of OAs alone                         | 24 294 | 78 694 | 30.87  |  | 7.92 (7.41, 8.47)    | <0.001 |  | 0.17 (0.16, 0.17) | <0.001 |
| First 90 days of LAIAs alone                        | 2196   | 4727   | 46.45  |  | 9.46 (8.76, 10.21)   | <0.001 |  | 0.20 (0.19, 0.21) | <0.001 |
| Subsequent use of LAIAs alone                       | 3303   | 19 644 | 16.81  |  | 3.95 (3.67, 4.26)    | <0.001 |  | 0.08 (0.08, 0.09) | <0.001 |
| First 90 days of OAs plus LAIAs                     | 7021   | 9072   | 77.39  |  | 16.92 (15.79, 18.12) | <0.001 |  | 0.35 (0.34, 0.37) | <0.001 |
| Subsequent use of OAs plus LAIAs                    | 14 185 | 61 314 | 23.13  |  | 5.90 (5.51, 6.31)    | <0.001 |  | 0.12 (0.12, 0.13) | <0.001 |
| <b>Incident suicide attempt</b>                     |        |        |        |  |                      |        |  |                   |        |
| Baseline                                            | 51     | 2212   | 2.31   |  | Ref                  | Ref    |  | 0.07 (0.05, 0.10) | <0.001 |
| Preexposure to antipsychotics                       | 95     | 453    | 20.98  |  | 14.19 (9.84, 20.45)  | <0.001 |  | Ref               | Ref    |
| First 90 days of OAs alone                          | 284    | 1595   | 17.80  |  | 11.72 (8.38, 16.38)  | <0.001 |  | 0.83 (0.65, 1.05) | 0.12   |
| Subsequent use of OAs alone                         | 454    | 7111   | 6.38   |  | 5.03 (3.59, 7.05)    | <0.001 |  | 0.35 (0.28, 0.45) | <0.001 |
| First 90 days of LAIAs alone                        | 51     | 619    | 8.24   |  | 5.25 (3.44, 8.01)    | <0.001 |  | 0.37 (0.26, 0.53) | <0.001 |
| Subsequent use of LAIAs alone                       | 70     | 1546   | 4.53   |  | 3.16 (2.08, 4.78)    | <0.001 |  | 0.22 (0.16, 0.31) | <0.001 |
| First 90 days of OAs plus LAIAs                     | 173    | 1227   | 14.10  |  | 9.86 (6.93, 14.02)   | <0.001 |  | 0.69 (0.53, 0.90) | 0.007  |
| Subsequent use of OAs plus LAIAs                    | 275    | 4554   | 6.04   |  | 5.00 (3.51, 7.12)    | <0.001 |  | 0.35 (0.27, 0.46) | <0.001 |
| <b>Secondary outcomes</b>                           |        |        |        |  |                      |        |  |                   |        |
| <b>Hospitalizations for somatic disorders</b>       |        |        |        |  |                      |        |  |                   |        |
| Baseline                                            | 4462   | 17 739 | 25.15  |  | Ref                  | Ref    |  | Ref               | Ref    |
| Preexposure to antipsychotics                       | 2385   | 2498   | 95.49  |  | 3.88 (3.68, 4.09)    | <0.001 |  | 0.71 (0.67, 0.75) | <0.001 |
| First 90 days of OAs alone                          | 5294   | 8495   | 62.32  |  | 2.75 (2.62, 2.88)    | <0.001 |  | 0.45 (0.43, 0.47) | <0.001 |
| Subsequent use of OAs alone                         | 29 232 | 62 899 | 46.47  |  | 1.75 (1.68, 1.83)    | <0.001 |  | 0.57 (0.54, 0.61) | <0.001 |
| First 90 days of LAIAs alone                        | 2111   | 3758   | 56.18  |  | 2.22 (2.09, 2.35)    | <0.001 |  | 0.39 (0.37, 0.41) | <0.001 |
| Subsequent use of LAIAs alone                       | 6078   | 15 987 | 38.02  |  | 1.51 (1.44, 1.59)    | <0.001 |  | 0.54 (0.51, 0.57) | <0.001 |
| First 90 days of OAs plus LAIAs                     | 3668   | 7618   | 48.15  |  | 2.08 (1.98, 2.20)    | <0.001 |  | 0.38 (0.36, 0.40) | <0.001 |
| Subsequent use of OAs plus LAIAs                    | 19 293 | 55 978 | 34.47  |  | 1.48 (1.41, 1.55)    | <0.001 |  | 0.71 (0.67, 0.75) | <0.001 |
| <b>Hospitalizations for cardiovascular diseases</b> |        |        |        |  |                      |        |  |                   |        |
| Baseline                                            | 726    | 5124   | 14.17  |  | Ref                  | Ref    |  | 0.17 (0.15, 0.19) | <0.001 |
| Preexposure to antipsychotics                       | 481    | 638    | 75.38  |  | 5.83 (5.15, 6.61)    | <0.001 |  | Ref               | Ref    |

|                                  |        |        |       |  |                       |        |  |                     |        |
|----------------------------------|--------|--------|-------|--|-----------------------|--------|--|---------------------|--------|
| First 90 days of OAs alone       | 800    | 2315   | 34.56 |  | 3.10 (2.75, 3.49)     | <0.001 |  | 0.53 (0.47, 0.60)   | <0.001 |
| Subsequent use of OAs alone      | 4946   | 19 516 | 25.34 |  | 1.85 (1.67, 2.06)     | <0.001 |  | 0.32 (0.29, 0.35)   | <0.001 |
| First 90 days of LAIAs alone     | 362    | 1078   | 33.57 |  | 2.70 (2.34, 3.12)     | <0.001 |  | 0.46 (0.40, 0.53)   | <0.001 |
| Subsequent use of LAIAs alone    | 1030   | 5093   | 20.22 |  | 1.54 (1.35, 1.74)     | <0.001 |  | 0.26 (0.23, 0.30)   | <0.001 |
| First 90 days of OAs plus LAIAs  | 543    | 2352   | 23.08 |  | 2.25 (1.97, 2.57)     | <0.001 |  | 0.38 (0.34, 0.44)   | <0.001 |
| Subsequent use of OAs plus LAIAs | 3235   | 18 198 | 17.78 |  | 1.60 (1.43, 1.79)     | <0.001 |  | 0.27 (0.25, 0.31)   | <0.001 |
| Extrapyramidal symptoms          |        |        |       |  |                       |        |  |                     |        |
| Baseline                         | 462    | 29 566 | 1.56  |  | Ref                   | Ref    |  | 0.12 (0.11, 0.14)   | <0.001 |
| Preexposure to antipsychotics    | 384    | 4252   | 9.03  |  | 8.28 (7.20, 9.51)     | <0.001 |  | Ref                 | Ref    |
| First 90 days of OAs alone       | 11 524 | 15 861 | 72.66 |  | 64.00 (57.94, 70.70)  | <0.001 |  | 7.73 (6.98, 8.57)   | <0.001 |
| Subsequent use of OAs alone      | 4365   | 96 937 | 4.50  |  | 5.78 (5.21, 6.41)     | <0.001 |  | 0.70 (0.63, 0.78)   | <0.001 |
| First 90 days of LAIAs alone     | 3559   | 6518   | 54.61 |  | 51.06 (46.04, 56.62)  | <0.001 |  | 6.17 (5.54, 6.86)   | <0.001 |
| Subsequent use of LAIAs alone    | 483    | 25 964 | 1.86  |  | 2.31 (2.02, 2.65)     | <0.001 |  | 0.28 (0.24, 0.32)   | <0.001 |
| First 90 days of OAs plus LAIAs  | 11 452 | 13 903 | 82.37 |  | 90.73 (82.10, 100.26) | <0.001 |  | 10.96 (9.88, 12.15) | <0.001 |
| Subsequent use of OAs plus LAIAs | 1755   | 87 256 | 2.01  |  | 3.00 (2.69, 3.36)     | <0.001 |  | 0.36 (0.32, 0.41)   | <0.001 |

Note: The preexposure period was defined as the 30 days before any antipsychotic treatment and the baseline period was defined as the non-treatment period except the preexposure period.

Abbreviations: OAs, oral antipsychotics; LAIAs, long-acting injectable antipsychotics; IRR, incidence rate ratio; CI, confidence interval; ED, emergency department.

\*Beyond the first 90 days in each treatment period

#Adjusted for age (1-year bands) and season (cut by the first date of March, May, September, and November)

**eTable 15.** The Rate of Outcome Events During Different Risk Windows

| Outcome event                              | Events, No. | Person-years | Incidence per 100 person-years |
|--------------------------------------------|-------------|--------------|--------------------------------|
| <b>Primary outcomes</b>                    |             |              |                                |
| All-cause ED visits                        |             |              |                                |
| Baseline                                   | 20 292      | 29 988       | 67.67                          |
| Preexposure to antipsychotics              | 14 253      | 3881         | 367.27                         |
| First 90 days of OAs alone                 | 25 556      | 12 743       | 200.55                         |
| 90-180 days of OAs alone                   | 12 750      | 8951         | 142.44                         |
| 180-365 days of OAs alone                  | 17 797      | 13 696       | 129.94                         |
| >365 days of OAs alone                     | 71 891      | 68 708       | 104.63                         |
| First 90 days of LAIAs alone               | 10 951      | 5615         | 195.01                         |
| 90-180 days of LAIAs alone                 | 4945        | 3255         | 151.93                         |
| 180-365 days of LAIAs alone                | 6007        | 4460         | 134.69                         |
| >365 days of LAIAs alone                   | 15 661      | 16 641       | 94.11                          |
| First 90 days of OAs plus LAIAs            | 21 836      | 11 061       | 197.41                         |
| 90-180 days of OAs plus LAIAs              | 10 913      | 7659         | 142.49                         |
| 180-365 days of OAs plus LAIAs             | 14 594      | 11 698       | 124.76                         |
| >365 days of OAs plus LAIAs                | 59 179      | 61 861       | 95.67                          |
| All-cause hospitalizations                 |             |              |                                |
| Baseline                                   | 5377        | 28 786       | 18.68                          |
| Preexposure to antipsychotics              | 9715        | 3738         | 259.91                         |
| First 90 days of OAs alone                 | 15 043      | 12 264       | 122.66                         |
| 90-180 days of OAs alone                   | 6380        | 8656         | 73.71                          |
| 180-365 days of OAs alone                  | 8626        | 13 263       | 65.04                          |
| >365 days of OAs alone                     | 35 328      | 66 552       | 53.08                          |
| First 90 days of LAIAs alone               | 4133        | 5374         | 76.91                          |
| 90-180 days of LAIAs alone                 | 1621        | 3111         | 52.10                          |
| 180-365 days of LAIAs alone                | 1783        | 4248         | 41.98                          |
| >365 days of LAIAs alone                   | 5055        | 15 554       | 32.50                          |
| First 90 days of OAs plus LAIAs            | 10 784      | 10 421       | 103.48                         |
| 90-180 days of OAs plus LAIAs              | 4156        | 7230         | 57.48                          |
| 180-365 days of OAs plus LAIAs             | 5246        | 11 005       | 47.67                          |
| >365 days of OAs plus LAIAs                | 20 757      | 55 958       | 37.09                          |
| Hospitalizations for psychiatric disorders |             |              |                                |
| Baseline                                   | 1564        | 26 561       | 5.89                           |
| Preexposure to antipsychotics              | 8268        | 3516         | 235.16                         |
| First 90 days of OAs alone                 | 11 341      | 11 516       | 98.48                          |
| 90-180 days of OAs alone                   | 4101        | 8152         | 50.31                          |
| 180-365 days of OAs alone                  | 5362        | 12 462       | 43.03                          |
| >365 days of OAs alone                     | 19 206      | 62 188       | 30.88                          |
| First 90 days of LAIAs alone               | 2590        | 4976         | 52.06                          |
| 90-180 days of LAIAs alone                 | 934         | 2875         | 32.49                          |
| 180-365 days of LAIAs alone                | 944         | 3908         | 24.15                          |
| >365 days of LAIAs alone                   | 1905        | 13 921       | 13.68                          |
| First 90 days of OAs plus LAIAs            | 8156        | 9454         | 86.27                          |



|                                               |        |        |        |
|-----------------------------------------------|--------|--------|--------|
| 90-180 days of OAs plus LAIAs                 | 2628   | 6525   | 40.28  |
| 180-365 days of OAs plus LAIAs                | 3189   | 9856   | 32.35  |
| >365 days of OAs plus LAIAs                   | 9884   | 47 059 | 21.00  |
| <b>Hospitalizations for schizophrenia</b>     |        |        |        |
| Baseline                                      | 1123   | 24 484 | 4.59   |
| Preexposure to antipsychotics                 | 6837   | 3295   | 207.47 |
| First 90 days of OAs alone                    | 9142   | 10 845 | 84.30  |
| 90-180 days of OAs alone                      | 3317   | 7695   | 43.10  |
| 180-365 days of OAs alone                     | 4443   | 11 784 | 37.70  |
| >365 days of OAs alone                        | 16 534 | 59 214 | 27.92  |
| First 90 days of LAIAs alone                  | 2196   | 4727   | 46.45  |
| 90-180 days of LAIAs alone                    | 795    | 2727   | 29.16  |
| 180-365 days of LAIAs alone                   | 804    | 3702   | 21.72  |
| >365 days of LAIAs alone                      | 1704   | 13 215 | 12.89  |
| First 90 days of OAs plus LAIAs               | 7021   | 9072   | 77.39  |
| 90-180 days of OAs plus LAIAs                 | 2293   | 6270   | 36.57  |
| 180-365 days of OAs plus LAIAs                | 2807   | 9495   | 29.56  |
| >365 days of OAs plus LAIAs                   | 9085   | 45 549 | 19.95  |
| <b>Incident suicide attempt</b>               |        |        |        |
| Baseline                                      | 51     | 2212   | 2.31   |
| Preexposure to antipsychotics                 | 95     | 453    | 20.98  |
| First 90 days of OAs alone                    | 284    | 1595   | 17.80  |
| 90-180 days of OAs alone                      | 86     | 92     | 9.35   |
| 180-365 days of OAs alone                     | 95     | 1279   | 7.43   |
| >365 days of OAs alone                        | 273    | 4912   | 5.56   |
| First 90 days of LAIAs alone                  | 51     | 619    | 8.24   |
| 90-180 days of LAIAs alone                    | 22     | 295    | 7.46   |
| 180-365 days of LAIAs alone                   | 20     | 359    | 5.58   |
| >365 days of LAIAs alone                      | 28     | 893    | 3.14   |
| First 90 days of OAs plus LAIAs               | 173    | 1227   | 14.10  |
| 90-180 days of OAs plus LAIAs                 | 51     | 662    | 7.70   |
| 180-365 days of OAs plus LAIAs                | 63     | 879    | 7.17   |
| >365 days of OAs plus LAIAs                   | 161    | 3012   | 5.34   |
| <b>Secondary outcomes</b>                     |        |        |        |
| <b>Hospitalizations for somatic disorders</b> |        |        |        |
| Baseline                                      | 4462   | 17 739 | 25.15  |
| Preexposure to antipsychotics                 | 2385   | 2498   | 95.49  |
| First 90 days of OAs alone                    | 5294   | 8495   | 62.32  |
| 90-180 days of OAs alone                      | 3055   | 6016   | 50.78  |
| 180-365 days of OAs alone                     | 4350   | 9307   | 46.74  |
| >365 days of OAs alone                        | 21 827 | 47 576 | 45.88  |
| First 90 days of LAIAs alone                  | 2111   | 3758   | 56.18  |
| 90-180 days of LAIAs alone                    | 921    | 2174   | 42.37  |
| 180-365 days of LAIAs alone                   | 1142   | 2983   | 38.28  |
| >365 days of LAIAs alone                      | 4015   | 1083   | 37.07  |
| First 90 days of OAs plus LAIAs               | 3668   | 7618   | 48.15  |

|                                              |        |        |       |
|----------------------------------------------|--------|--------|-------|
| 90-180 days of OAs plus LAIAs                | 2037   | 532    | 38.29 |
| 180-365 days of OAs plus LAIAs               | 2826   | 8145   | 34.70 |
| >365 days of OAs plus LAIAs                  | 14 430 | 42 513 | 33.94 |
| Hospitalizations for cardiovascular diseases |        |        |       |
| Baseline                                     | 726    | 5124   | 14.17 |
| Preexposure to antipsychotics                | 481    | 638    | 75.38 |
| First 90 days of OAs alone                   | 800    | 2315   | 34.56 |
| 90-180 days of OAs alone                     | 471    | 1728   | 27.25 |
| 180-365 days of OAs alone                    | 719    | 2783   | 25.84 |
| >365 days of OAs alone                       | 3756   | 15 004 | 25.03 |
| First 90 days of LAIAs alone                 | 362    | 1078   | 33.57 |
| 90-180 days of LAIAs alone                   | 139    | 661    | 21.02 |
| 180-365 days of LAIAs alone                  | 177    | 939    | 18.85 |
| >365 days of LAIAs alone                     | 714    | 3493   | 20.44 |
| First 90 days of OAs plus LAIAs              | 543    | 2352   | 23.08 |
| 90-180 days of OAs plus LAIAs                | 280    | 1698   | 16.49 |
| 180-365 days of OAs plus LAIAs               | 427    | 2653   | 16.09 |
| >365 days of OAs plus LAIAs                  | 2528   | 13 846 | 18.26 |
| Extrapyramidal symptoms                      |        |        |       |
| Baseline                                     | 462    | 29 566 | 1.56  |
| Preexposure to antipsychotics                | 384    | 4252   | 9.03  |
| First 90 days of OAs alone                   | 11 524 | 15 861 | 72.66 |
| 90-180 days of OAs alone                     | 841    | 10 038 | 8.38  |
| 180-365 days of OAs alone                    | 864    | 14 943 | 5.78  |
| >365 days of OAs alone                       | 2660   | 71 956 | 3.70  |
| First 90 days of LAIAs alone                 | 3559   | 6518   | 54.61 |
| 90-180 days of LAIAs alone                   | 143    | 3536   | 4.04  |
| 180-365 days of LAIAs alone                  | 165    | 4758   | 3.47  |
| >365 days of LAIAs alone                     | 175    | 1767   | 0.99  |
| First 90 days of OAs plus LAIAs              | 11 452 | 13 903 | 82.37 |
| 90-180 days of OAs plus LAIAs                | 478    | 8491   | 5.63  |
| 180-365 days of OAs plus LAIAs               | 416    | 12 647 | 3.29  |
| >365 days of OAs plus LAIAs                  | 861    | 66 117 | 1.30  |

Abbreviations: OAs, oral antipsychotics; LAIAs, long-acting injectable antipsychotics; ED, emergency

department.

**eFigure 1.** Illustration of Self-controlled Case Series Study for Indirect Comparison

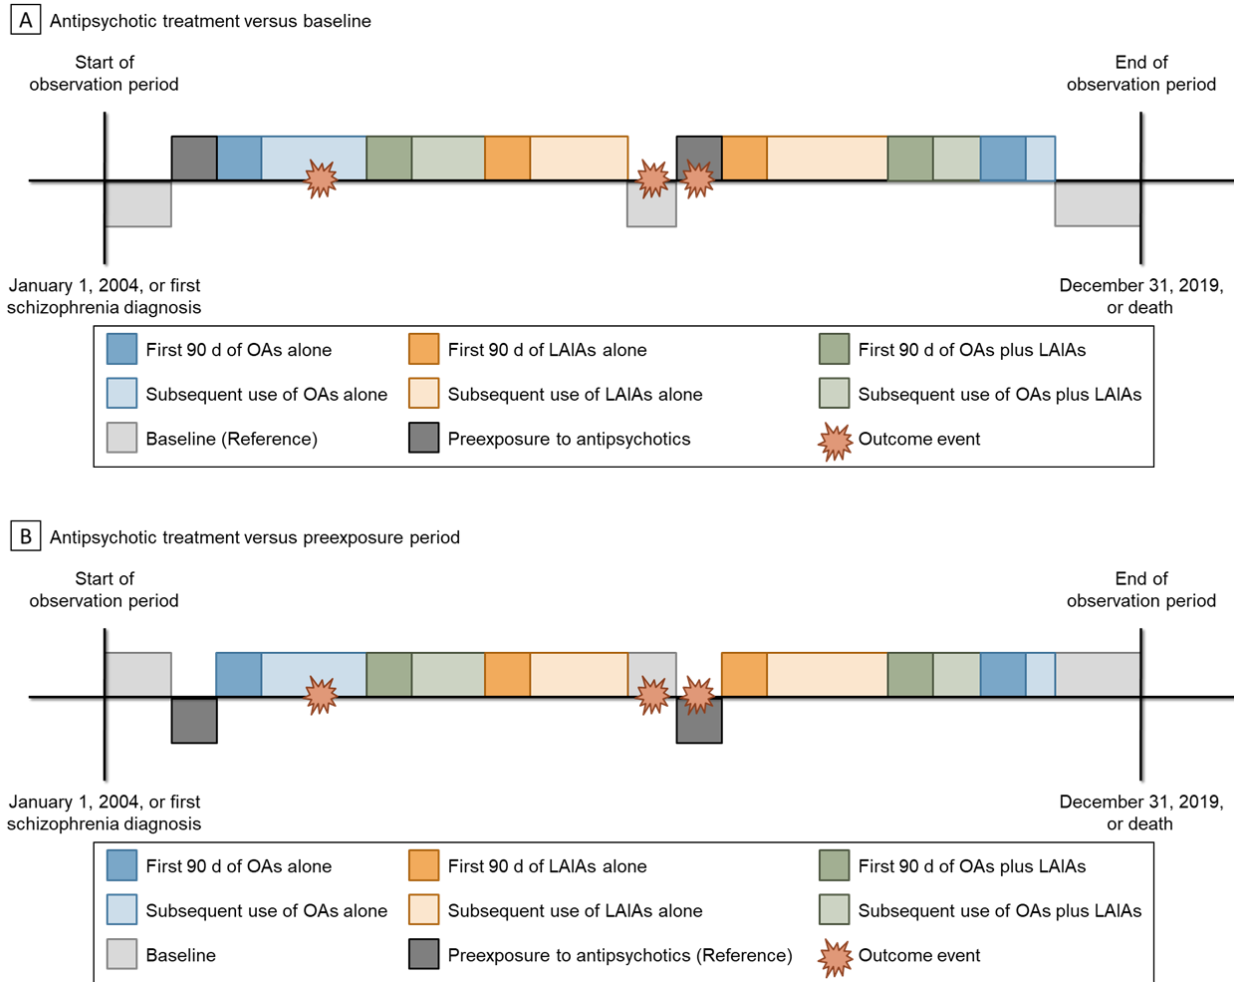

Abbreviations: OAs, oral antipsychotics; LAIAs, long-acting injectable antipsychotics.

Note: This Figure highlights only one example of the potential sequence of medication regimen received, for illustration purposes only.

**eFigure 2. Patient Identification**

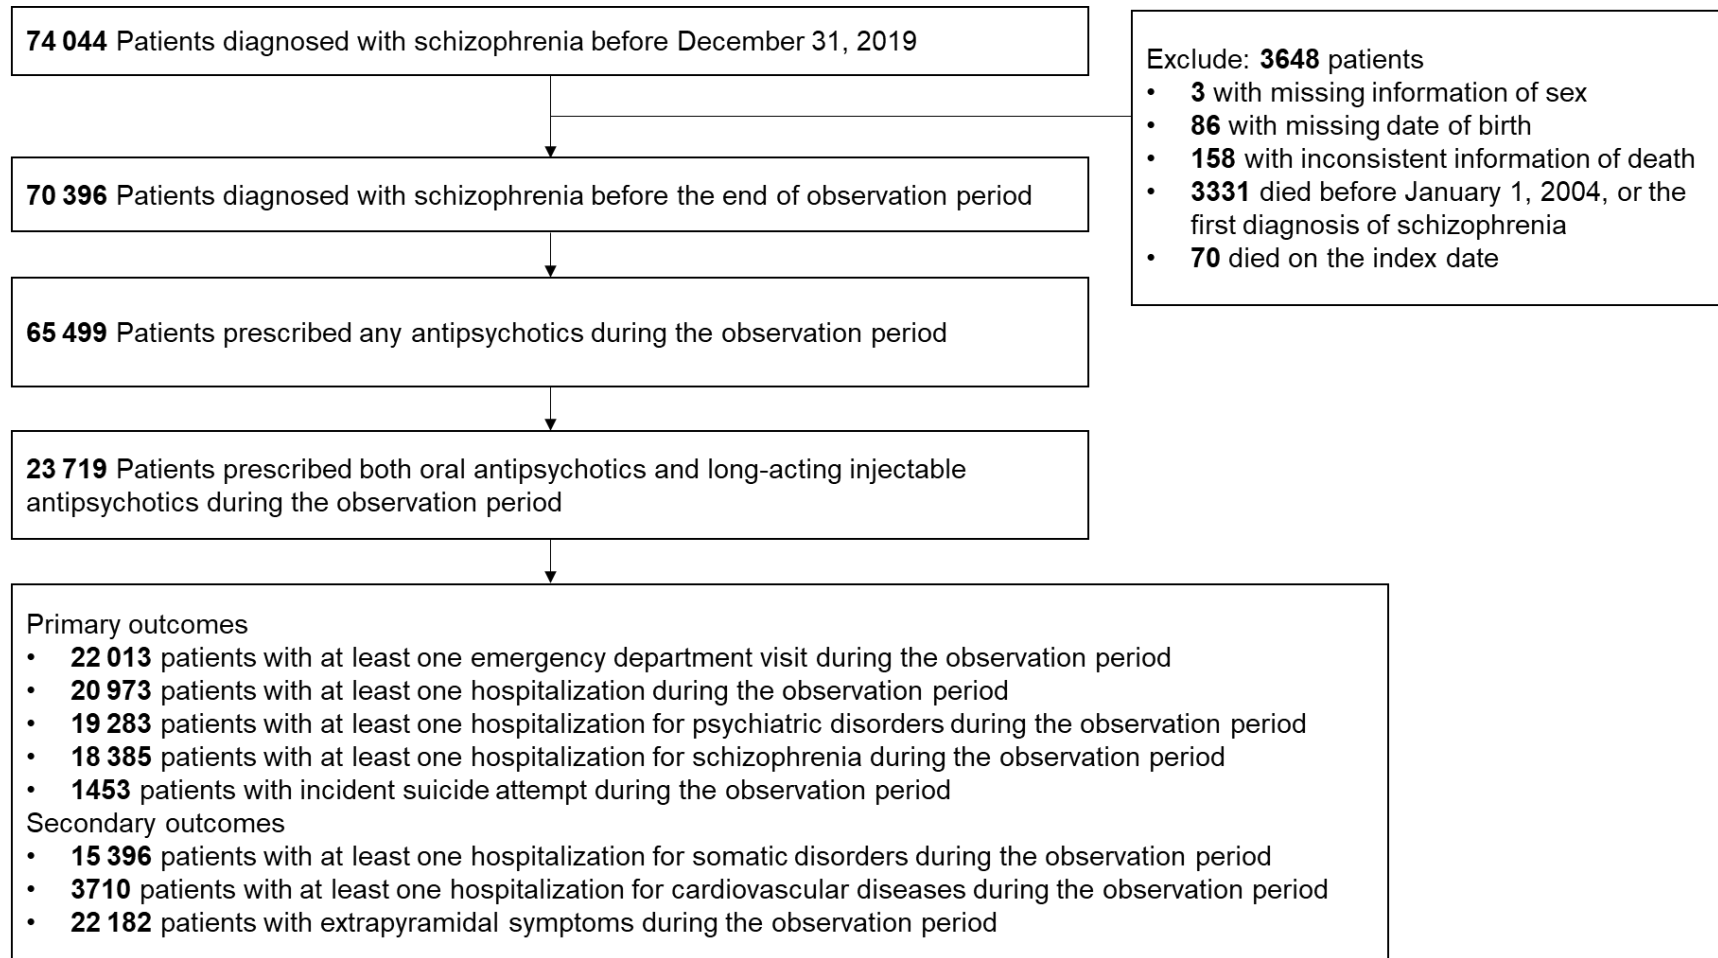

**eFigure 3.** Subgroup Analyses for the Use of LAIAs vs OAs and Risk of Outcomes, During the Subsequent Treatment Period

**A. Primary outcomes**

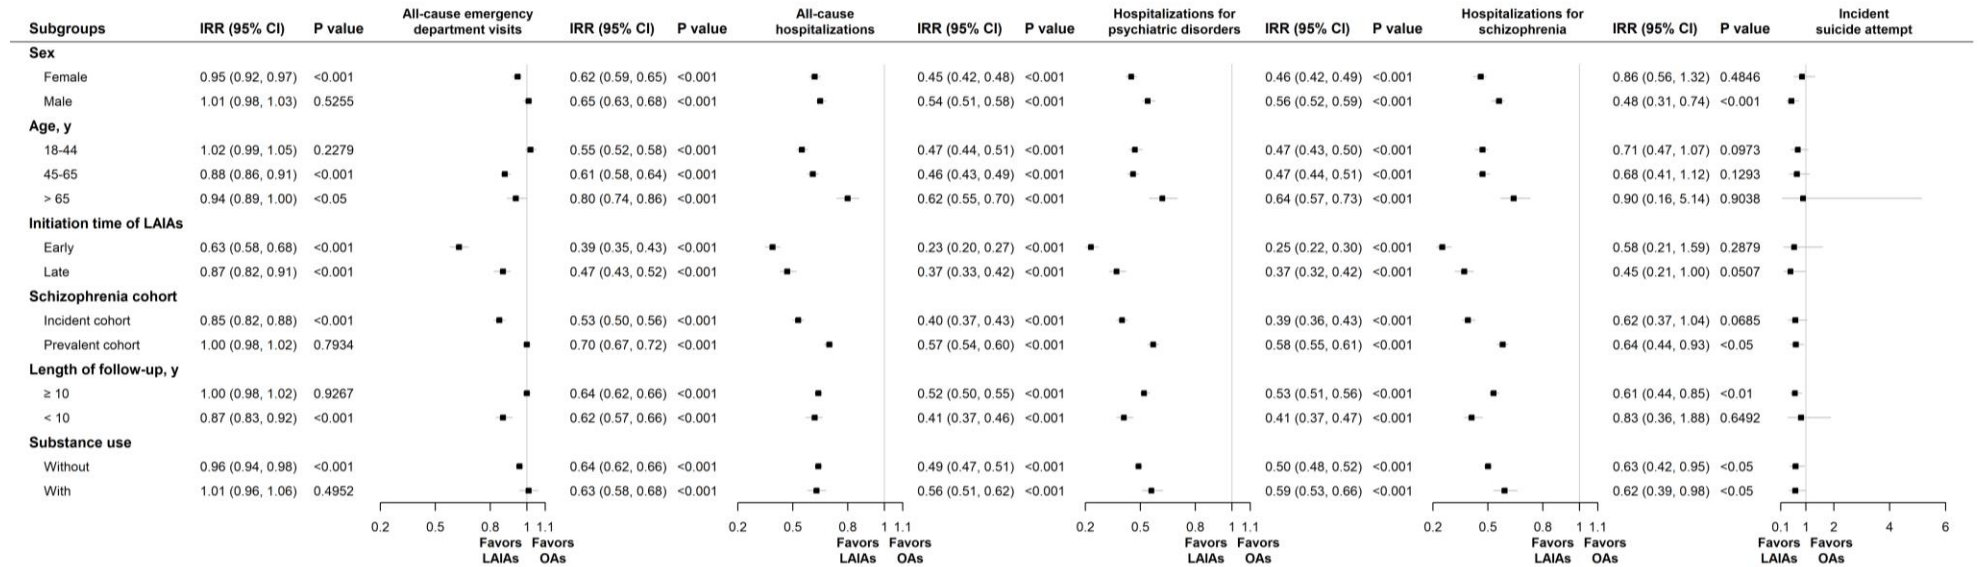

**B. Secondary outcomes**

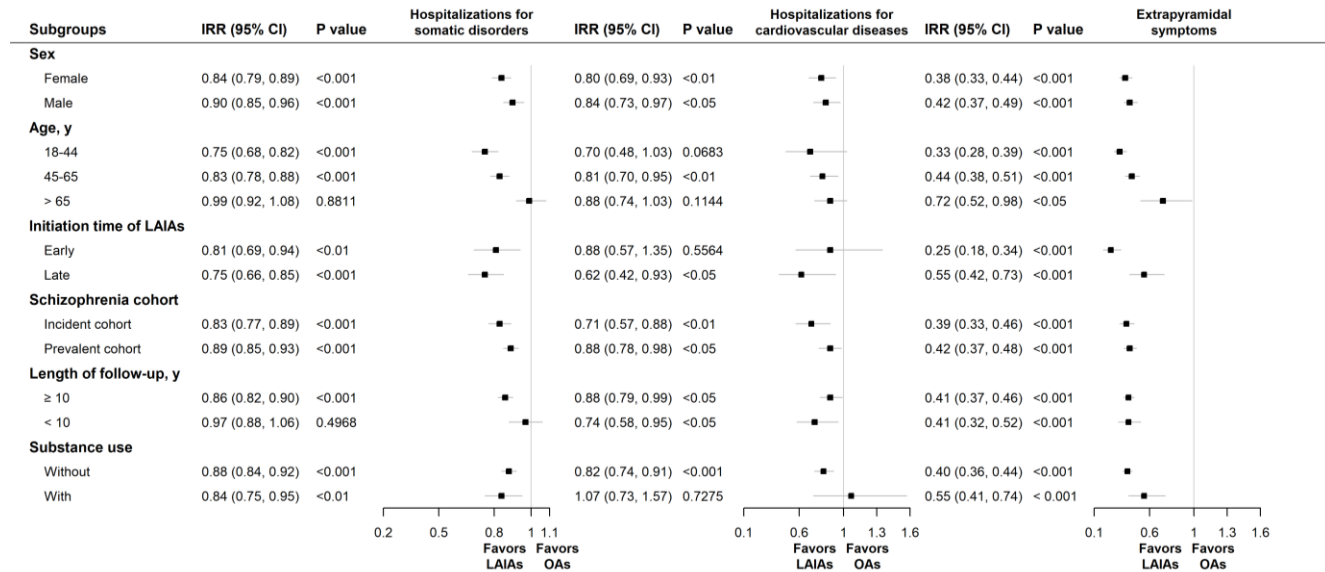

Abbreviations: OAs, oral antipsychotics; LAIAs, long-acting injectable antipsychotics; IRR, incidence rate ratio; CI, confidence interval; ED, emergency department.

Note: The IRR estimation was adjusted for age (1-year bands) and season (cut by the first date of March, May, September, and November)

## eReferences.

1. Bertolini F, Ostuzzi G, Pievani M, Aguglia A, Bartoli F, Bortolaso P, et al. Comparing long-acting antipsychotic discontinuation rates under ordinary clinical circumstances: A survival analysis from an observational, pragmatic study. *CNS Drugs*. 2021;doi:10.1007/s40263-021-00809-w
2. VanderWeele TJ, Ding P. Sensitivity analysis in observational research: Introducing the e-value. *Ann Intern Med*. 2017;167(4):268-274. doi:10.7326/M16-2607
3. Hirano Y. Risk of extrapyramidal syndromes associated with psychotropic polypharmacy: A study based on large-scale japanese claims data. *Ther Innov Regul Sci*. 2020;54(2):259-268. doi:10.1007/s43441-019-00026-0
4. Abouzaid S, Tian H, Zhou H, Kahler KH, Harris M, Kim E. Economic burden associated with extrapyramidal symptoms in a medicaid population with schizophrenia. *Community Ment Health J*. 2014;50(1):51-8. doi:10.1007/s10597-012-9561-7
